# Supplementary material
Source: PubMed Central journal article supplement (PMC7264849)
Supplement: mmc3.pdf [file mmc3.pdf]

# CompuCell3D Simulations Reproduce Mesenchymal Cell Migration on Flat Substrates

Ismael Fortuna,<sup>1</sup> Gabriel C. Perrone,<sup>1</sup> Monique S. Krug,<sup>1</sup> Eduarda Susin,<sup>1</sup> Julio M. Belmonte,<sup>2,3</sup> Gilberto L. Thomas,<sup>1,\*</sup> James A. Glazier,<sup>2</sup> and Rita M. C. de Almeida<sup>1,4,5,\*</sup>

<sup>1</sup>Instituto de Física, Universidade Federal do Rio Grande do Sul, Porto Alegre, Rio Grande do Sul, Brazil; <sup>2</sup>Biocomplexity Institute and Department of Intelligent Systems Engineering, Indiana University, Bloomington, Indiana; <sup>3</sup>Department of Physics, North Carolina State University, Raleigh, North Carolina; <sup>4</sup>Instituto Nacional de Ciência e Tecnologia, Sistemas Complexos, Universidade Federal do Rio Grande do Sul, Porto Alegre, Rio Grande do Sul, Brazil; and <sup>5</sup>Program de Pós Graduação em Bioinformática, Universidade Federal do Rio Grande do Norte, Natal, Rio Grande do Norte, Brazil

**ABSTRACT** Mesenchymal cell crawling is a critical process in normal development, in tissue function, and in many diseases. Quantitatively predictive numerical simulations of cell crawling thus have multiple scientific, medical, and technological applications. However, we still lack a low-computational-cost approach to simulate mesenchymal three-dimensional (3D) cell crawling. Here, we develop a computationally tractable 3D model (implemented as a simulation in the CompuCell3D simulation environment) of mesenchymal cells crawling on a two-dimensional substrate. The Fürth equation, the usual characterization of mean-squared displacement (*MSD*) curves for migrating cells, describes a motion in which, for increasing time intervals, cell movement transitions from a ballistic to a diffusive regime. Recent experiments have shown that for very short time intervals, cells exhibit an additional fast diffusive regime. Our simulations' *MSD* curves reproduce the three experimentally observed temporal regimes, with fast diffusion for short time intervals, slow diffusion for long time intervals, and intermediate time -interval-ballistic motion. The resulting parameterization of the trajectories for both experiments and simulations allows the definition of time- and length scales that translate between computational and laboratory units. Rescaling by these scales allows direct quantitative comparisons among *MSD* curves and between velocity autocorrelation functions from experiments and simulations. Although our simulations replicate experimentally observed spontaneous symmetry breaking, short-timescale diffusive motion, and spontaneous cell-motion reorientation, their computational cost is low, allowing their use in multiscale virtual-tissue simulations. Comparisons between experimental and simulated cell motion support the hypothesis that short-time actomyosin dynamics affects longer-time cell motility. The success of the base cell-migration simulation model suggests its future application in more complex situations, including chemotaxis, migration through complex 3D matrices, and collective cell motion.

**SIGNIFICANCE** We develop a three-dimensional computer simulation model that reproduces many of the typical behaviors of cells crawling in vitro on a flat, homogeneous substrate: spontaneous polarization without external cues, persistent migration and intermittent loss, and reformation of leading edges. The method is fast enough to use in scientific and engineering simulations of tissues. Cell crawling has diffusive and ballistic characteristics, depending on the chosen measurement time interval and experiment duration, and thus requires care in analysis to yield robust, accurate metrics that allow the comparison of cell-migration kinetics among simulations and experiments. We present a method to simulate cell migration in three dimensions that yields quantitatively reproducible cell-migration kinetics. The code specifying the simulation is an open source and publicly available.

## INTRODUCTION

Designing cell arrangements and extracellular environments to construct engineered tissues for medical and technolog-

ical applications (1) requires multiscale virtual-tissue simulations able to predict final tissue architectures from initial conditions. Cells migrate extensively during the maturation of engineered tissues; migration is also ubiquitous in embryonic development (2), wound healing (3,4), inflammatory response (5), and many pathologies (6). Thus, multiscale virtual-tissue simulations of morphogenesis, pathology, and the dynamics of normal and wounded tissues all require

Submitted November 4, 2019, and accepted for publication April 20, 2020.

\*Correspondence: [ght@if.furgs.br](mailto:ght@if.furgs.br) or [rita@if.ufrgs.br](mailto:rita@if.ufrgs.br)

Editor: Pablo Iglesias.

<https://doi.org/10.1016/j.bpj.2020.04.024>

© 2020 Biophysical Society.

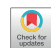

simulation of the motion of large numbers of cells. Both in vitro and in vivo, cell motion often correlates closely with cell polarization, with strong positive feedback between biochemical and structural polarization within the cell, and directional movement of the entire cell or cell sub-regions. Many biochemical feedback mechanisms participate simultaneously in cell polarization (7–11), making complete analysis challenging.

For models and their simulations to be useful in tissue engineering, the simulations must provide verifiable quantitative predictions. Model parameter identification and model hypothesis validation both require metrics to compare simulations to experiments. We recently proposed using a modified Fürth equation for the mean-squared displacement (*MSD*) to characterize cell motion (12). The modified Fürth equation describes three temporal regimes: fast diffusion for short time intervals, slow diffusion for long time intervals, and intermediate time-interval-ballistic motion. The regimes are characterized by three well-defined parameters (the “diffusion constant”  $D$ , the “dimensionless excess diffusion coefficient”  $S$ , and the “long timescale”  $P$ ). After rescaling in terms of natural units for length and time, experimental *MSD* curves collapse onto a single-parameter family of curves. The same collapse occurs for the related mean velocity autocorrelation functions, providing a robust metric for cell migration that we can readily apply to simulation data. In this manner, this analysis provides a helpful translation between simulation and experimental length and time units. As we have discussed elsewhere, as with classic Brownian motion, the cell’s short-timescale diffusive movement means that the cell’s instantaneous velocity is ill-defined (12), necessitating a careful choice of time intervals when estimating cell velocity in both experiment and simu-

lation. Fig. 1 schematically summarizes how the modified Fürth equation allows quantification of the short time/range regime in addition to the intermediate and long time/range regimes, which the classic Fürth equation addresses.

Here, we build a model for crawling cells in three dimensions, whose simulation spontaneously generates all three temporal regimes and is fast enough to be used in multicellular simulations. We first discuss the biological cell behaviors that our model reproduces and appropriate metrics to assess the model’s predictivity. We then describe the simulation’s CompuCell3D implementation and present our results. CompuCell3D is a freely available, open-source, cross-platform environment for specifying and executing multicellular simulations (<https://compuCell3d.org/>). The CompuCell3D code used for our simulations, as well as detailed instructions to run it, are available in [Supporting Materials and Methods](#).

### Mesenchymal cell migration and the purpose and limits of our model

In in vitro assays of isolated cell crawling, initially symmetric, nonmotile cells polarize to start movement (11,13–19), enriching their presumptive trailing edges with Rac and forming a lamellipodium at their presumptive leading edges. Complex biochemical reactions inside the cells act to form actin-rich protrusions at the leading edge of the cell, focal adhesions between the cell and substrate, and contractile fibers at the trailing edge of the cell, causing the cell to migrate (20–23). Chemical gradients can induce cell polarization in particular directions in in vitro assays (24), suggesting that polarization may follow mechanisms like those proposed by Turing (25) and Gierer and Meinhardt

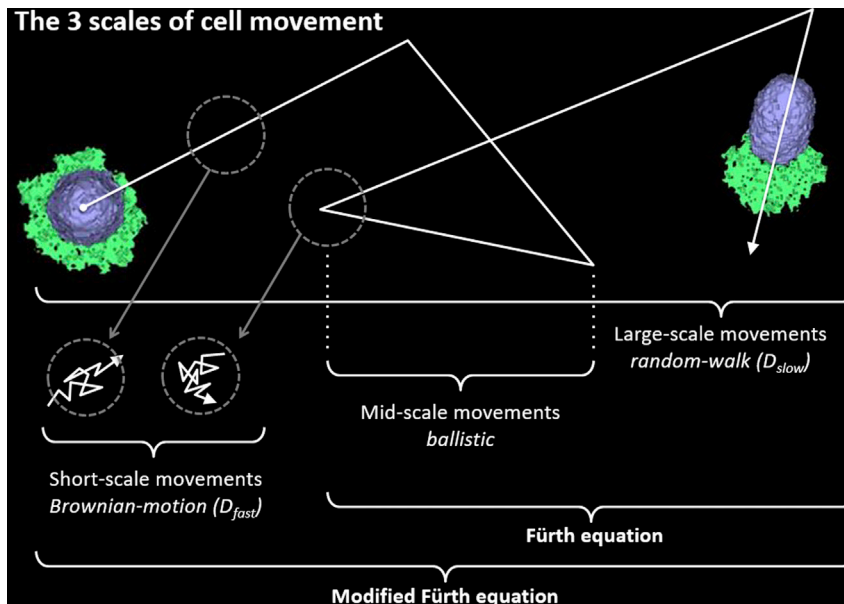

FIGURE 1 Schematic of the three temporal regimes of mean-squared cell displacement as a function of time interval. The classic and modified Fürth equations generate the same intermediate and long time/range behaviors. However, only the modified Fürth equation describes the short time/range diffusive behavior resulting from the timescale for the organization and reorganization of the cell’s leading edge. To see this figure in color, go online.

(26,27), in which weak external signals induce directional symmetry breaking via self-amplifying feedback and long-range inhibition within the cell. We define the polarization direction in migrating cells as the net direction of polymerizing actin and myosin flow from the cell front toward the cell body and rear (in reference to the cell's center of mass, the polarization axis points opposite to the cell's direction of movement, whereas in the laboratory reference frame, the polarization axis points in the same direction as the cell's direction of movement).

Numerous phenomenological models simulate the polarization and movement of single cells, linking microscopic biochemical models to cell-scale behaviors (13–15,23,28–37). The broad consensus of these models is that the anisotropy of cell migration, which leads to persistent macroscale random motion, results from spontaneous spatial symmetry breaking because of the stochastic internal microscale dynamics of the cell's actin cytoskeleton. However, the details of these mechanisms are still unclear. Other models address how the elastic and/or viscoelastic cytoskeletal and extracellular networks interact to produce the multiple migration modes observed when cells crawl on a flat substrate or move through a three-dimensional (3D) matrix (38–45), with the last reference presenting an overview of the mechanisms and models. Here, we do not focus on intracellular mechanisms. Instead we present a simplified phenomenological model of cell migration that includes coupling between front protrusion and rear retraction, which are necessary to any model of cell crawling, but neglects most microscopic detail. Our goal is not to explore the microscopic dynamics that give rise to cell crawling but to produce a tractable cell model that recapitulates the kinetics and response to external stimuli of real cells at both short timescales and long timescales. This work focuses on a single cell crawling on a flat, homogeneous surface. We will explore crawling on heterogeneous surfaces, the movement of cells in response to chemical fields, and migration through 3D extracellular matrices in future works.

Cell polarization is a key ingredient in cell migration. Many phenomenological models with a wide variety of base assumptions successfully replicate key experimental observations on the polarization and movement of single cells (28,29,31,46), suggesting that multiple microscopic mechanisms can produce the pattern polarization onset, persistence, and reorganization that are key qualitative characteristics of cell migration. On the experimental side, Maiuri and collaborators showed that retrograde actin flow speed is proportional to the speed of migrating cells (23). Also, Gundersen and Worman showed that nuclear position is asymmetric in migrating eukaryotic cells, with the nucleus displaced toward the rear along the rear-to-front axis (47). Similar polarization models have been proposed for dendritic cells (32), keratocyte migration (13,33,34), epithelial cells (14), and generic mesenchymal cells (15,35). These models all link microscopic biochemical models to

cell-scale behaviors. Related models explain intracellular traveling waves and lamellipodium fluctuations (36) and how the regulation of myosin activity in protrusions inhibits the simultaneous formation of multiple lamellipodia (34). All the models we have mentioned focus on explaining the intracellular mechanisms responsible for cell crawling and are computationally demanding, whereas we aim to produce a simpler, less computationally demanding phenomenological model that still reproduces the key macroscopic statistical properties of experimental cell migration.

Cell motility submodels to use in tissue-engineering applications must be simple, but not too simple. We consider a few major constraints on these applications. In these applications, models must describe cell shapes, shape dynamics, and the interactions between cells in the context of collective migration of large numbers of cells, often within structured 3D environments. Tissue and organ simulations involving many cells require fast simulations of cell polarization initiation, migration, and reorientation. The need for a fast single-cell migration model motivated us to consider a simplified polarization and migration model in which each simulated migrating cell has the appropriate three-dimensional geometry, a stiff nucleus, the ability to form lamellipodia, and appropriate responses to external stimuli. A stiff nucleus is necessary to describe cell morphology (the lamellipodium is much thinner than the cell body) because nuclear resistance to deformation is the primary obstacle preventing cells from migrating through dense 3D fiber matrices or narrow channel openings. An identifiable nuclear component also provides a measure for polarization that agrees with the experimental observation that the nucleus lags behind the cell center in migrating cells. We therefore include a stiff nucleus as a component of our model.

As design goals for model cells that can be used in larger-scale models of cell migration in tissues and organs, model cells should 1) be three-dimensional, with explicitly modeled lamellipodium, cytoplasm, and nucleus; 2) employ intracellular coupling between global inhibition and local excitation to regulate membrane protrusion and cell polarization; 3) polarize spontaneously to initiate migration; 4) spontaneously change movement direction to yield a persistent random walk with timescales tunable to match experiments; and 5) successfully reproduce the three experimentally observed timescale regimes for the *MSD* of isolated migrating cells. Here, we present a simulation that meets these criteria and is fast enough to allow the simulation of the collective motion of many cells (we will present our collective motion results in a future study). We stress, however, that unlike the more detailed models we have cited, our simplified model does not explore in detail the intracellular mechanisms involved in cell crawling. Fits of our simulated cell trajectories to the modified Fürth equation allow objective, quantitative comparison with previously published experimental trajectories to assess

simulation realism. Finally, we discuss the validity limits of the simulation and the maximum permissible intervals between images and minimum permissible simulation duration to provide time series that allow meaningful quantification of cell movement.

### Cell migration parameterization

Cell migration assays, both in experiments and simulations, start from cell trajectories obtained using time-lapse imaging with a time interval (typically from 1 s to 5 min) between frames in an experiment of duration  $T$ . Next, we determine  $MSDs$  for individual cells. Often, we then average the  $MSDs$  over different experiments or different cells of the same type within an experiment. Recently, we proposed to characterize cell motion using a modified Fürth equation (12):

$$|\Delta\vec{r}|^2 = 2D\left(\Delta t - P\left(1 - e^{-\frac{\Delta t}{P}}\right)\right) + \frac{2DS}{1-S}\Delta t, \quad (1)$$

where the  $S$  is the “excess diffusion coefficient” such that  $0 \leq S < 1$ . This equation gives the cell’s  $MSD$ ,  $|\Delta\vec{r}|^2$ , during a time interval  $\Delta t$ . Here,  $P$  is a persistence time, and  $D$  is a diffusion coefficient, as in the original Fürth equation, which is a solution to an Ornstein-Uhlenbeck process (48). Equation 1 reduces to the original Fürth equation when  $S = 0$ , so that  $\lim_{\Delta t \rightarrow 0} |\Delta\vec{r}|^2 = (2D/P)\Delta t^2$ , which means that cell motion is ballistic for small time intervals. However, if  $S > 0$ , cell motion is diffusive for  $\Delta t < SP$ , that is,  $\lim_{\Delta t \rightarrow 0} |\Delta\vec{r}|^2 = (2DS/1-S)\Delta t$ . For  $SP < \Delta t < P$ , cell motion is ballistic with an effective speed  $v_{eff} = (1/1-S)\sqrt{D/P}$ ; for  $\Delta t > P$ , cell motion is again diffusive, with  $|\Delta\vec{r}|^2 \sim (2D/1-S)\Delta t$ . The two diffusive regimes have different diffusion constants: we define  $D_{fast} = (DS/1-S)$  for the fast, short-time behavior and  $D_{slow} = (D/1-S)$  for long time intervals (12).  $S = (D_{fast}/D_{slow})$  defines the timescale of the additional short-time diffusion term that augments the original Fürth equation, justifying its name.

Equation 1 allows us to define time- and length scales,  $P$  and  $\sqrt{2DP/(1-S)}$ , respectively, which then define nondimensional variables for time and displacement,  $\tau \equiv (t/P)$  and  $\vec{p} \equiv (\vec{r}/\sqrt{2DP/(1-S)})$ . Expressed using these nondimensional variables, the modified Fürth equation has only one parameter, the excess diffusion coefficient  $S$ :

$$|\Delta\vec{p}|^2 = \Delta\tau - (1-S)(1 - e^{-\Delta\tau}) \quad (2)$$

In the left panel of Fig. 2, we present plots of Eqs. 1 and 2 for different values of  $S$ . The gray line shows the original Fürth model, with  $S = 0$ . When  $S > 0$ , the cell’s instantaneous velocity is ill defined, although we can still calculate a mean velocity over any finite time interval. We have shown elsewhere (12) that for real cells, the mean velocity

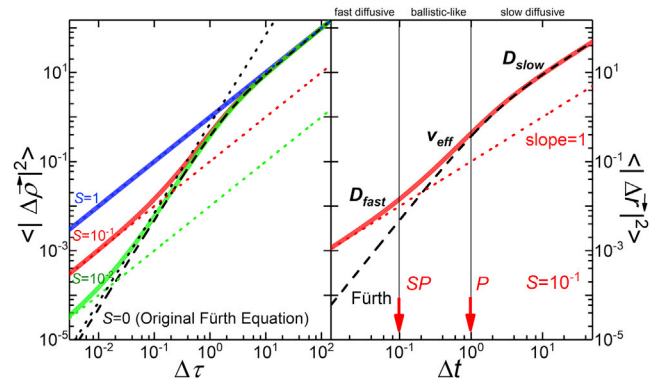

FIGURE 2 Modified Fürth Equation. The left panel shows a plot of Eq. 2, the modified Fürth equation with the axes in nondimensional units, for different values of the excess diffusion coefficient  $S$ . The black dashed line corresponds to the original Fürth equation, with  $S = 0$ . For  $S > 0$  (colored solid lines), the short-time diffusive interval increases with  $S$ . The right panel shows the modified Fürth equation with  $S = 0.1$ . We distinguish the three different regimes characterized by  $D_{fast}$ ,  $v_{eff}$ , and  $D_{slow}$ . To see this figure in color, go online.

autocorrelation function, where the mean velocity is calculated over a time interval  $\delta$ , with  $SP < \delta < P$ , is half the second derivative of the  $MSD$  (12). The right panel in Fig. 2 illustrates the three regimes and indicates the crossovers at  $\Delta t = SP$  (fast diffusion to ballistic) and at  $\Delta t = P$  (ballistic to slow diffusion).

From either experimental or simulated trajectories, we can measure  $D$ ,  $P$ , and  $S$  in the following way. Considering the temporal sequence of cell positions from either an experiment or simulation, we calculate the  $MSD$ . Using the second derivative of Eq. 1, with respect to  $\Delta t$ , we can determine  $D$  and  $P$  by fitting the data with this curve. To determine  $S$ , we first subtract the fitting curve from the raw data. We then fit the result with a straight line, favoring points at short time intervals. From the slope of this line, we estimate  $S$ , and from the intercept, we estimate a possible localization error. We explain this procedure in detail in the Supporting Materials and Methods, Section S1, and provide explicit examples applied to experimental data in (12). Thus, we can obtain a nondimensional  $MSD$  curve for any pseudorandom cell trajectory and map it onto a one-parameter family of curves (parameterized by  $S$ ) given by Eq. 2. In (12), we show that cell trajectory data from five laboratories (49–53) for different cell types, substrates, and setups all fit Eq. 2. Here, we apply this method to quantify simulation results, enabling straightforward quantitative comparison between simulations and experiments.

## METHODS

### Conceptual model

To represent the different biomechanical properties of the different portions of the cell, in our model, we represent a cell as a 3D object with three distinct internal compartments: nucleus, cytoplasm, and lamellipodium

(we will use the italics to distinguish simulation objects from biological objects, e.g., *cell* versus cell). Cells move because of actin treadmilling so, on a rigid substrate, the focal points that connect the cytoskeleton to the substrate barely move with respect to the laboratory. As the cell moves forward, the focal points move backward with respect to the cell's center of mass. When the focal points are in or near the lamellipodium, in the front of the cell, the cytoplasm is rich in RAC, which maintains their integrity and strong binding to the substrate. When they approach the rear of the cell, the cytoplasm is rich in Rho-A, which promotes focal-point disassembly. Our simplified model does not represent focal points explicitly, and we model these very rich dynamics by assuming that the *lamellipodium* compartment adheres more strongly to the substrate than the *cell's* cytoplasm compartment (10,17,19). Because nuclei are very rigid compared to cytoplasm (47), we include a stiff quasispherical nuclear compartment.

The *cell* exists in an external environment composed of a two-dimensional substrate plane, on which the *cell* crawls and moves, and an empty space, the *medium*, that surrounds the *cell*. The *lamellipodium* compartment generates an *F-actin* field that promotes *lamellipodium* expansion at the *lamellipodium-medium* interface, creating a local feedback loop resulting in protrusive *cell* movement. Volume and interfacial area constraints over all *cell* compartments ensure the global movement of the whole *cell* in the direction of *lamellipodium* expansion. The same constraints on the *lamellipodium* compartment also provide a long-range inhibition mechanism, constraining the *cell's* *lamellipodial* extension. Long-range inhibition together with local excitation is a necessary ingredient for spontaneous symmetry breaking (26).

## Computational model

Our simulations of the biology of cell migration employ the CP/GGH model (41,54,55) implemented in the open source CompuCell3D simulation environment (56). The CP/GGH model divides space into a cubic cell lattice, with each lattice site  $\vec{r} = (x, y, z)$  having an integer label  $\sigma$ . We define a *cell*  $\sigma$  as the set of lattice sites sharing the same label  $\sigma$ . For readers familiar with CompuCell3D, we note that the simulation represents each *cell* compartment (*nucleus*, *cytoplasm*, and *lamellipodium*) as a single CompuCell3D generalized cell and the modeled cell as a CompuCell3D cell cluster.

Another label,  $C$ , identifies one of the three compartments within each *cell*: *nucleus* ( $C = 1$ ), *cytoplasm* ( $C = 2$ ), or *lamellipodium* ( $C = 3$ ). Defining *cell* compartments allows the subregions of the *cell* to have different biomechanical properties, as observed in real cells (57–59). We define *substrate* and *medium* as additional types of generalized cell.

Configuration changes in the CP/GGH occur “stochastically”; we first calculate the “effective energy” of the current configuration of the *cell* lattice (see below),  $E_{initial}$ , then randomly pick a source *cell* lattice site and an adjacent target *cell* lattice site. If the source and target lattice sites lie in different *cells* or *compartments*, we propose to copy labels  $\sigma$  and  $C$  from the source to the target lattice site, which moves the boundary between the two *cells* or *compartments*, and calculate the effective energy of the proposed final configuration,  $E_{final}$ . The difference between the final and initial effective energies  $\Delta E \equiv E_{final} - E_{initial}$  represents the “change of energy” for a movement of the boundary between the initial and final positions, so  $-\Delta E(\text{copy distance})$  is the “effective force” in the direction of the copy attempt. Here, we take *copy distance* = 1. If  $\Delta E \leq 0$ , we accept the copy, and if  $\Delta E > 0$ , we accept the copy with probability  $\exp(-\Delta E/T_B)$ , where  $T_B$  is a Boltzmann-like fluctuation amplitude associated with the amplitude of the noise term in the Langevin and Fürth equations. In this dynamics, the average velocity of a boundary in a given direction is proportional to the effective force in that direction (overdamped dynamics), as long as the typical magnitude  $|\Delta E/T_B| \ll 1$ . The configuration can only change if the selected lattice sites have different labels  $\sigma$  and/or  $C$ . The natural time unit of the simulation, a Monte Carlo step (MCS), consists of  $N = L_x \times L_y \times L_z$  such choices and copy attempts, where  $L_x$ ,  $L_y$ , and  $L_z$  are the  $x$ ,  $y$ , and  $z$  dimensions of the lattice, in (lattice sites)<sup>1/3</sup>.

The following discussion of the effective energy considers a single *cell* but generalizes easily to arbitrary numbers of cells.

The effective energy includes terms that describe all the separate biological mechanisms we wish to include in our model:

$$E = E_{interface} + E_{target\ volume} + E_{F-actin}, \quad (3)$$

where  $E_{interface}$  is the typical Potts model term that quantifies the interfacial energy of the *cell* spatial configuration:

$$E_{interface} = \sum_{\vec{r}} \sum_{\vec{v}(\vec{r})} J(\sigma(\vec{r}), C(\vec{r}); \sigma(\vec{v}), C(\vec{v})) \times [1 - \delta(\sigma(\vec{r}) - \sigma(\vec{v}))][1 - \delta(C(\vec{r}) - C(\vec{v}))], \quad (4)$$

where  $J(\sigma(\vec{r}), C(\vec{r}); \sigma(\vec{v}), C(\vec{v}))$  is the interfacial energy per lattice site of contact surface between neighboring lattice sites at sites at  $\vec{r}$  and  $\vec{v}$ , whose labels are  $\sigma(\vec{r}), C(\vec{r})$  and  $\sigma(\vec{v}), C(\vec{v})$ . The sum over  $\vec{v}(\vec{r})$  sums over the fourth-neighbor range around  $\vec{r}$  (32 neighbors) to reduce lattice anisotropy (60). For neighboring lattice sites that belong to the same *cell* and *compartment* ( $\sigma(\vec{r}) = \sigma(\vec{v})$  and  $C(\vec{r}) = C(\vec{v})$ ),  $J = 0$ . In all other cases, we set  $J(\sigma(\vec{r}), C(\vec{r}); \sigma(\vec{v}), C(\vec{v}))$  to be ferromagnetic (i.e., interfacial energies are positive). A correct choice of energy hierarchies ensures that the *cytoplasm* always surrounds the *nucleus* and the *lamellipodium* remains attached to the *cytoplasm*, *substrate*, and *medium* (see Fig. 3).

The second term on the right-hand side of Eq. 3 constrains the volume of each *cell* compartment to be close to its reference volume:

$$E_{target\ volume} = \sum_{C=1}^3 \lambda_C (V_C - V_C^{target})^2, \quad (5)$$

where  $V_C$  is the current volume of the  $C^{\text{th}}$  *cell* compartment,  $V_C^{target}$  is its target volume, and  $\lambda_C$  is the inverse compressibility of the compartment.

The last term in Eq. 3, extends the usual CP/GGH effective energy to describe the protrusive forces F-actin polymerization exerts on the leading edge of the cell. We first define an *actin field*  $F(\vec{r}, t)$  associated with the *lamellipodium* compartment of the *cell* that obeys the simplified reaction-diffusion equation:

$$\frac{\partial F(\vec{r}, t)}{\partial t} = D_F \nabla^2 F(\vec{r}, t) + k_{source} \delta(C(x, y, 1) - 3) - k_{decay} F(\vec{r}, t), \quad (6)$$

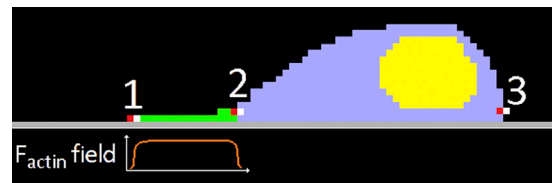

FIGURE 3 Schematic representation of crawling dynamics in a simulated *cell*. The actin field in lattice sites occupied by *lamellipodium*, represented in green, favors *lamellipodium* lattice sites overwriting *medium* lattice sites, increasing the volume of the *lamellipodium* compartment and extending the compartment to the left (1). The volume constraint on the *lamellipodium* compartment then favors *cytoplasm* lattice sites overwriting *lamellipodium* lattice sites, decreasing *lamellipodium* compartment volume and increasing *cytoplasm* compartment volume (2). Finally, the volume constraint on the *cytoplasm* compartment favors *medium* lattice sites overwriting *cytoplasm* compartment lattice sites. Together, these three steps create a polarization axis and polarized force generation that causes a net migration of the *cell* in the direction of the *lamellipodium* compartment (to the left in the figure). To see this figure in color, go online.

where  $k_{source}$  represents the rate of nucleation and polymerization of F-actin fibers, which occur only at lattice sites belonging to the *lamellipodium compartment* that touch the *substrate*;  $D_F$  is an effective diffusion constant for actin inside the *cell* (we do not model active transport of F-actin); and  $k_{decay}$  represents the depolymerization rate of F-actin fibers within the *cell* (which also cleans up the model artifact that a moving *cell* allows a small amount of *F-actin* to “leak out” of the *cell*). We could have modeled the actin field equation in a variety of ways, subject to the condition that its evolution keeps the *actin field* reasonably constant inside the *lamellipodium* and nearly zero outside such that the gradient is different from zero at the *cytoplasm-medium* boundary (see Fig. 3).

We then use this *actin field* to apply an extensional force on the *lamellipodium-medium* leading edge by increasing the probability of a source site  $\vec{r}$  in the *lamellipodium compartment* overwriting a target site  $\vec{v}$  in the surrounding *medium* using the following correction to the difference in effective energy:

$$\Delta E_{F-actin} = \lambda_{F-actin} [F(\vec{v}) - F(\vec{r})] \delta(C(\vec{r}) - 3) \delta(\sigma(\vec{v}) - \text{medium}), \quad (7)$$

where the Kronecker deltas  $\delta$  confine the force to act only on the boundary between lattice sites lying in the *lamellipodium compartment* of a *cell* and the surrounding *medium*.

Equation 7 applies a force to the membrane in the direction  $(\vec{v} - \vec{r})$  of the copy attempt of magnitude,  $-\Delta E_{F-actin}/(\text{copy distance})$ , where *copy distance* is the distance between the source and copy lattice sites.  $F(\vec{r})$  is the field specifying the concentration of *F-actin*, and  $\lambda_{F-actin} > 0$  is the force per area per unit *F-actin*.  $\Delta E_{F-actin}$  increases the probability that a lattice site in the *lamellipodium* of the *cell* overwrites a neighboring *medium* lattice site. Observe that the gradient in the *F-actin field* reflects that actin filaments inside the *cytoplasm* apply an outward force on the membrane toward the *medium*, whereas no active forces in the *medium* push back in the opposite direction. Equation 7 does not attempt to provide a detailed mechanistic description of actin network dynamics and force generation but, with the assistance of Eq. 6, heuristically models the force the actin network exerts on the cell front during protrusion.

The  $\Delta E_{F-actin}$  term, coupled with the volume constraint in Eq. 5 and interfacial energy in Eq. 4, also increases the rate at which *cytoplasm* lattice sites overwrite *lamellipodium* lattice sites and *medium* lattice sites overwrite *cytoplasm* lattice sites at the rear of the *cell*, creating a polarization axis that directs *cell* migration in the direction of the *lamellipodium compartment*, as Fig. 2 shows schematically. Consequently, the model mechanisms also couple cell-front protrusion to cell-rear contraction.

## Cell crawling simulations

Our simulations consider *cells* with a total target number of lattice sites (including all three compartments) of  $(4\pi/3)R_{cell}^3$ , where the  $R_{cell}$  is the “equivalent radius” of a sphere with the same target volume as the *cell*. We use a 3D square lattice with periodic boundary conditions in the  $(x, y)$  plane of size  $(L_x, L_y, L_z)$ , scaled in units of  $R_{cell}$ , and settings  $L_z = 2.1R_{cell}$  and  $L_x = L_y \in [8R_{cell}, 14R_{cell}]$ .

Initially, the *cell* consists of two compartments, the *cytoplasm* and *nucleus*, with no *lamellipodium*. A *lamellipodium* forms when the *cell* contacts the *substrate*; after each Monte Carlo step, we convert any *cytoplasm* lattice site that touches *substrate* into a *lamellipodium* lattice site with a probability proportional to  $\left(1 - V_3/V_3^{target}\right)$ . This timescale is important only when the *lamellipodium* volume  $V_3$  is much different from its target value  $V_3^{target}$ , that is, at early times in a simulation when *lamellipodium* is being created. We calculate statistics in motion only after the simulated *cell* achieves stationary behavior or details on the CompuCell3D simulation and the initial conditions (see Section S2 in the [Supporting Materials and Methods](#)).

The target volumes, together with the inverse compressibility of each compartment ( $\lambda_C$ ), allow the *cell* to move while maintaining the volumes of each compartment within 1% of their target values (6).

For a given *cell* equivalent radius  $R_{cell}$ , we set the *cell*'s target volume to  $V_{cell}^{target} = (4\pi/3)R_{cell}^3$ . The volume fractions of the *nucleus* and *lamellipodium* compartments are  $\phi_n = V_1^{target}/V_{cell}$  and  $\phi_l = V_3^{target}/V_{cell}$ . We varied three simulation parameters,  $R_{cell}$ ,  $\phi_l$ , and  $\lambda_{F-actin}$ . We considered the following parameter ranges:  $0.05 \leq \phi_l \leq 0.3$ ,  $0 \leq \lambda_{F-actin} \leq 250$ , and  $10 \text{ (lattice sites)}^{1/3} \leq R_{cell} \leq 20 \text{ (lattice sites)}^{1/3}$ . These ranges cover the three-parameter space in which the *cells* move and do not lose their *lamellipodium*. We keep all other parameters constant, chosen as we discuss below.

We chose the interfacial energies between *cell compartments* to guarantee that lattice sites composing a *cell* occupy a connected region of the lattice. We established the hierarchy of the interfacial energies by adjusting the Young contact angle for any triad of compartments so that the *cell* shape reproduces the shape observed in typical experiments. The *nucleus* compartment has high interfacial energy with both the *medium* and *substrate*, ensuring that it remains surrounded by the *cytoplasm*. *Lamellipodium* binds more strongly to *substrate* than *cytoplasm* binds to *substrate* to replicate the experimental observation that the leading edge of a cell migrating on a substrate adheres to the substrate more strongly than the trailing edge adheres to the substrate (35,61). In fact, as long as the energy hierarchy is right, the lowest energy configuration is the same. What matters then is the ratio of surface energy per site  $T_B$ . We need to maintain the approximate ratio  $(E_{interface}/T_B) \sim 1$ . When this ratio is much bigger than 1, the simulation freezes; if it is much less than 1, the simulation's equilibrium configuration goes from ferromagnetic to isotropic, and the cell falls apart. As long as we choose parameters between these limits, the exact values of the interface energy per site do not have much effect on the simulation. We chose the different inverse compressibility values such that the contribution from  $E_{target\ volume}$  to the simulation dynamics is on the order of the contribution from  $E_{interface}$ . This balance guarantees that the target volume term constrains the cell volume without causing the cell to freeze. We chose  $\lambda_{F-actin}$  similarly to balance the force contributed by the chemotaxis effective energy with the forces contributed by the other effective energy terms. In practice, we scale  $T_B$  and all effective energy terms by  $E_{interface}$ . After this, we can constrain the total effective energy, and thus the typical value of  $E_{interface}$ , as follows. The CP/GGH has a numerical stability speed limit of  $\sim 0.1\text{--}0.2$  lattice sites/MCS. This speed is determined by the typical change in total energy  $\Delta E$  when we make a lattice

copy and means that we must define our parameters so that  $e^{\left(\frac{\Delta E}{T_B}\right)} \leq 0.1$ . We set  $E_{interface}$  to meet this requirement. Finally, we chose the nucleus volume fraction  $\phi_n = V_1^{target}/V_{cell} = 0.15$  based on the typical values in experiments. Table 1 provides our reference simulation parameter values.

Fig. 4 shows typical *cell* migration behavior for a typical set of parameters. A *cell* suspended in *medium* is symmetrical, lacks a *lamellipodium*, and does not migrate ( $A, A', A''$ ). When the *cell cytoplasm* (*gray*) touches the *substrate*, a roughly symmetrical *lamellipodium* (*green*) forms and spreads over the *substrate*, forming a circular halo around the *cytoplasm* ( $B, B', B''$ ). Instability in the feedback between the reaction-diffusion equation for *F-actin*, Eq. 6, and membrane protrusion due to Eq. 7 causes the *lamellipodium* to spontaneously lose its circular symmetry, and multiple incipient leading edges compete to drag the *cell*'s center of mass ( $C, C', C''$ ) in the  $xy$  plane. Positive feedback between *cell* movement and *F-actin* dynamics reinforces the asymmetry, selecting a single leading edge, and the *cell* develops a classical-migrating morphology ( $D, D', D''$ ). From time to time, the *lamellipodium* may split, returning to the morphology of competing incipient leading edges seen in ( $C, C'$ ), and ( $C''$ ); when one section of *lamellipodium* wins, the *cell* begins to move in a new direction. As in experiments, the *lamellipodium* (*green*) is much thinner than the rest of the *cell*. Sagittal sections ( $A'', B'', C'', D''$ ) show the *cell nucleus* (*yellow*) embedded in the *cytoplasm*. Video S1 provides a movie of simulated cell migration for  $R_{cell} = 15 \text{ (lattice sites)}^{1/3}$ ,  $\phi_l = 0.10$ , and  $\lambda_{F-actin} = 175$ .

**TABLE 1 Reference Parameter Values for Simulations**

| Reference Parameter Values for Simulations |                   |                            |                      |                      |                               |                         |                          |                    |                     |
|--------------------------------------------|-------------------|----------------------------|----------------------|----------------------|-------------------------------|-------------------------|--------------------------|--------------------|---------------------|
|                                            | $\phi_n$          | $D_F$                      | $\lambda_c$          | $\lambda_l$          | $\lambda_n$                   | $k_{decay}$             | $k_{source}$             | $T_B$              |                     |
|                                            | 0.15              | 0.0001                     | 10                   | 10                   | 10                            | 0.9                     | 0.9                      | 100                | –                   |
| $J_{medium-substrate}$                     | $J_{medium-cyto}$ | $J_{medium-lamellipodium}$ | $J_{medium-nucleus}$ | $J_{substrate-cyto}$ | $J_{substrate-lamellipodium}$ | $J_{substrate-nucleus}$ | $J_{cyto-lamellipodium}$ | $J_{cyto-nucleus}$ | $J_{front-nucleus}$ |
| 20                                         | 20                | 40/3                       | 100                  | 20                   | 20/3                          | 100                     | 20                       | 20                 | 40                  |

The units for simulations include an energy which is always rescaled by the typical fluctuation energy  $T$ , MCS for time and (lattice sites)<sup>1/3</sup> for length. Hence, units for the diffusion coefficient  $D_F$  are (lattice sites)<sup>2/3</sup>/MCS, for inverse compressibility ( $\lambda_c$ ,  $\lambda_l$ , and  $\lambda_n$ ) energy unit/(lattice sites)<sup>2</sup>, for decay and source time constants, 1/MCS, and, finally, for all surface energy terms  $J$ , energy unit/(lattice sites)<sup>2/3</sup>.

## RESULTS AND DISCUSSION

Fig. 5 shows the total cell displacement from its initial position after  $10^5$  MCSs as a function of  $\lambda_{F-actin}$  for four values of  $\phi_l$  and three values of  $R_{cell}$ . The dependence on  $\lambda_{F-actin}$  is always qualitatively the same: for small  $\lambda_{F-actin}$ , total cell displacement may be less than a cell diameter ( $2R_{cell}$ ), so the cell's center-of-mass motion is confined in the short-time diffusive regime, and the MSD log-log plot shows a straight line with slope 1. We classify cells with these behaviors as nonmotile.

For small lamellipodium volume fraction  $\phi_l$ , the lamellipodium never achieves a symmetrical configuration, favoring cell motility. However, for small  $\phi_l$  and large  $\lambda_{F-actin}$ , the lamellipodium can detach from the rest of the cell, which does not occur in normal cell migration.

For larger lamellipodium volume fraction  $\phi_l$ , migration requires that  $\lambda_{F-actin}$  be larger than some minimal value. For fixed  $\lambda_{F-actin}$ , increasing  $\phi_l$  decreases the persistence time of cell movement, so trajectories are more tortuous.

Fig. 6 shows sample configurations and sets of 10 trajectories each for cells with  $R_{cell} = 15$  (lattice sites)<sup>1/3</sup> for a range of values of  $\lambda_{F-actin}$  (the force each unit of lamellipodium generates) and  $\phi_l$  (the lamellipodium volume fraction). The background color is cyan for nonmotile cells, gray for migrating cells, and light red for simulations in which the lamellipodium compartment of the cell detaches

from the cytoplasm compartment. The parameters determine the persistence time of cell movement. For each parameter set, the MSD of the cells fits the modified F urth equation, Eq. 2, with a unique set of  $S$ ,  $P$ , and  $D$ . Figs. S1 and S2 show equivalent results for  $R_{cell} = 10$  and 20 (lattice sites)<sup>1/3</sup>.

Fig. 7 shows scaled MSD versus scaled time (the scaling was obtained by fitting for  $D$ ,  $P$ , and  $S$  with Eq. 2) for a variety of parameter regimes, showing that all trajectories collapse onto a family of curves characterized by the single parameter  $S$ . Table 2 gives fitted values. The insets present the MSD curves in unscaled simulation units. Figs. S3 and S4 show equivalent results for  $R_{cell} = 10$  and 20 (lattice sites)<sup>1/3</sup>.

Different underlying biophysical processes may produce identical MSD curves (51,62). Comparison between the temporal autocorrelations of the velocity could, in principle, resolve some of these redundancies. The velocity autocorrelation (VACF) is defined as

$$VACF \equiv \langle \vec{v}(t) \cdot \vec{v}(t + \Delta t) \rangle = \frac{1}{T - \Delta t} \int_0^{T - \Delta t} dt \vec{v}(t + \Delta t) \cdot \vec{v}(t), \quad (8)$$

where  $\langle \cdot \rangle$  represents averages over experiments or simulation replicas. For a classical persistent random walk, VACF

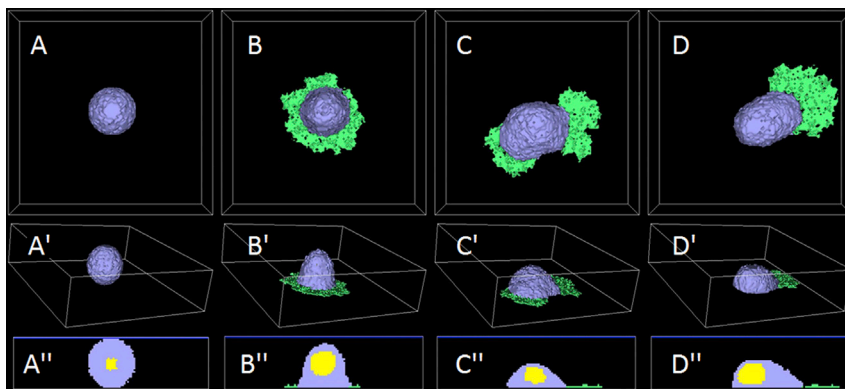

FIGURE 4 Onset of migration for an initially suspended, nonpolar cell coming into contact with a substrate. Shown here are the cytoplasm in violet, lamellipodium in green, and nucleus in yellow in three different views. Shown top to bottom are items as follows: the top view of the  $(x,y)$  plane, oblique three-dimensional rendering ( $z$  axis has the shortest length), and lateral sectional view of the  $(z,y)$  plane. (A) shows the initial symmetrical nonmotile cell with no lamellipodium; (B) shows a nonmotile cell with symmetrical lamellipodium; (C) shows that competition between incipient leading edges leads to the symmetry breaking; (D) shows that the selection of a dominant leading edge leads to persistent cell motion in the direction from the nucleus to the center of mass of the leading edge. The cell cycles

intermittently between states (C and D), changing direction with each cycle. The viewpoints are as follows: (A), (B), (C), and (D) show the top view; (A'), (B'), (C'), and (D') show the three-quarters view; (A''), (B''), (C''), and (D'') show the sagittal section. To see this figure in color, go online.

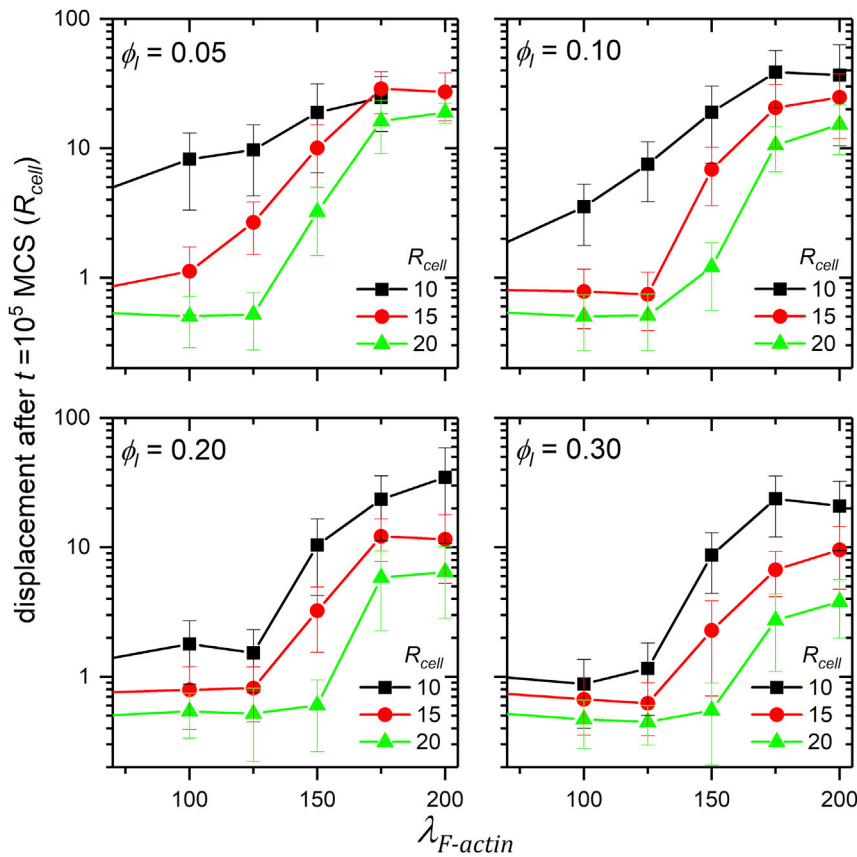

FIGURE 5 Cell displacements after  $10^5$  MCS in units of  $R_{cell}$  for different simulation parameters. For low  $\lambda_{F-actin}$ , the cell barely moves. The symbols and bars show means and standard errors for five replicas per parameter set. To see this figure in color, go online.

is a useful measure that may be obtained by taking the second time derivative of the MSD curve. However, when the motion over short time intervals is diffusive, instantaneous

velocity is not well defined (12), and we must use a mean velocity,  $\bar{v}(t, \epsilon)$ , calculated over an appropriate “finite” time interval  $\epsilon$ , defined as

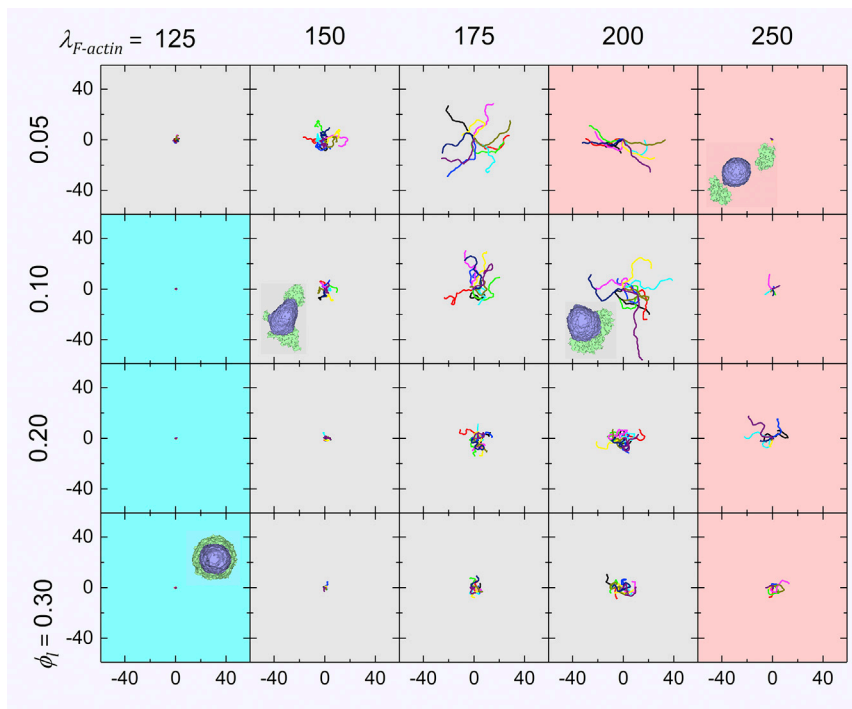

FIGURE 6 Typical simulated cell trajectories and (selected) cell morphologies for different values of  $\phi_l$  and  $\lambda_{F-actin}$ . Each panel shows 10 cell trajectories of length  $10^5$  MCS, with  $R_{cell} = 15$  (lattice sites)<sup>1/3</sup>. Axes show  $x$  and  $y$  positions measured relative to the center of the cell lattice in units of  $R_{cell}$ . The background color indicates confinement (cyan), persistent migration (gray), and artificial lamellipodium detachment (light red). Larger  $\lambda_{F-actin}$  and smaller  $\phi_l$  increase cell motility. When  $\lambda_{F-actin}$  is too small, the lamellipodium remains symmetrical and the cell does not migrate, whereas for very small  $\phi_l$ , the lamellipodium is not strong enough to drive cell migration (data not shown). To see this figure in color, go online.



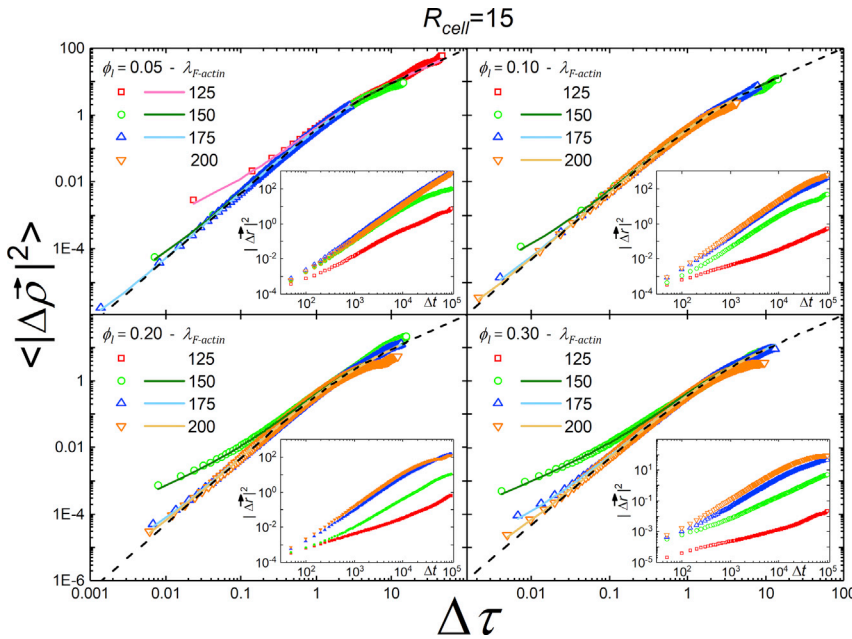

FIGURE 7  $MSD (|\Delta \vec{p}|^2)$  for simulated *cells* on a log-log scale, rescaled as described, averaged over five runs. The insets present the same data with length given in multiples of the equivalent *cell* radius and time in MCS. Observe that all rescaled simulation curves collapse to the same one-parameter family of curves characterized by  $S$ , as in (12). To see this figure in color, go online.

$$\vec{v}(t, \varepsilon) = \frac{\vec{r}(t+\varepsilon) - \vec{r}(t)}{\varepsilon},$$

or, in natural units,

$$\vec{u}(\tau, \delta) = \frac{\vec{r}(\tau+\delta) - \vec{r}(\tau)}{\delta}, \quad (9)$$

where  $\delta = (\varepsilon/P)$ . From  $\vec{u}(\tau, \delta)$ , we can define a “mean” velocity autocorrelation function  $\psi_\delta(\Delta\tau)$  as

$$\begin{aligned} \psi_\delta(\Delta\tau) &= \vec{u}(\tau, \delta) \cdot \vec{u}(\tau + \Delta\tau, \delta) \\ &= \frac{1}{T/P - \Delta\tau} \int_0^{T/P - \Delta\tau} d\tau \vec{u}(\tau, \delta) \cdot \vec{u}(\tau + \Delta\tau, \delta). \end{aligned} \quad (10)$$

$\psi_\delta$  detects artifactual correlations when  $\delta \geq \Delta\tau$  because in this case, the intervals used to calculate both  $\vec{u}(\tau, \delta)$  and  $\vec{u}(\tau + \Delta\tau, \delta)$  overlap.

Fig. 8, upper left panel, presents the mean speed  $|\vec{u}(\tau, \delta)|$  averaged over time and different runs for simulations with  $R_{cell} = 15$  (lattice sites)<sup>1/3</sup>,  $\phi_l = 0.10$ , and  $\lambda_{F-actin} = 150, 175$ , and 200 as a function of  $\delta$ :  $\delta : |\vec{u}(\tau, \delta)|$  does not converge to a finite value as  $\delta \rightarrow 0$  because of the diffusive behavior of the *cells* over short time intervals. We plotted the corresponding *MSDs* together to emphasize the existence of the three kinetic regimes. The other three panels present  $\psi_\delta(\Delta\tau)$  vs.  $\Delta\tau$  for different values of  $\delta$  corresponding to the simulations with  $R_{cell} = 15$  (lattice sites)<sup>1/3</sup>,  $\phi_l = 0.10$ , and  $\lambda_{F-actin}$  as indicated. We show data only for  $\delta < \Delta\tau$ . The modified Fürth equation fit for this simulation data considers the values of  $S$  indicated in the panels. For  $\Delta\tau > S$ , all rescaled curves are identical. For  $\Delta\tau < S$ , the second deriv-

ative of the modified Fürth equation fails to describe the observed decrease in  $\psi_\delta(\Delta\tau)$ . This failure results from the finite precision of the estimate of *cells*’ mean velocity: for small  $\delta$ , the uncorrelated displacement in the perpendicular direction of polarization dominates the correlated displacement parallel to polarization. When calculating  $\psi_\delta(\Delta\tau)$  for small  $\delta$  and finite precision, the contribution from the correlated Langevin component is lost as  $\Delta\tau$  decreases, resulting in a vanishing  $\psi_\delta(\Delta\tau)$  as  $\Delta\tau$  decreases (provided it is larger than  $\delta$ ).

Thus, for  $\delta < \Delta\tau < S$ , the second derivative of the original Fürth equation measures the autocorrelation between components of velocity parallel to the polarization, whereas the numerically obtained  $\psi_\delta(\Delta\tau)$  measures the correlation of components of a Brownian movement, which goes to zero as  $\Delta\tau \rightarrow 0$ . Reference (12) shows that experimental cell trajectories show identical behaviors.

To demonstrate that the present model and its simulations can quantitatively reproduce experimental data, we show a simulation ( $R_{cell} = 15$ ,  $\phi_l = 0.30$ , and  $\lambda_{F-actin} = 160$  over 30 replicates) that yields the value of  $S = 0.02$  obtained by Thomas et al. (12) for Metzner et al.’s experiments on MDA-MB-231 cell migration on fibronectin-coated substrates ( $N = 69$ ) (50). Trajectories were obtained by automatically tracking 69 cells whose positions were acquired every 1 min, determined from a characteristic intensity profile of the refraction pattern around the nucleus of the cell. Fig. 9 shows the overlap of simulation and experimental data for both *MSD* (left panel) and  $\psi_\delta(\Delta\tau)$  with  $\delta = 0.515$  (right panel), corresponding to 1 min. The experimental and simulation curves agree because Eq. 2 fits both raw data sets very well, providing the length and timescales that allow plotting both data sets on dimensionless axes.

**TABLE 2** Dependence of Fitted Values of  $S$ ,  $P$ , and  $D$  on Key Simulation Parameters for Simulations in which the *Cells* Are not Confined or Broken

| Simulation Fitting Parameters             |          |                     |           |                          |         |                              |
|-------------------------------------------|----------|---------------------|-----------|--------------------------|---------|------------------------------|
| $R_{cell}$ (lattice sites) <sup>1/3</sup> | $\phi_l$ | $\lambda_{F-actin}$ | $P$ (MCS) | $D$ ( $R_{cell}^2$ /MCS) | $S$     | $2DP/(1-S)$ ( $R_{cell}^2$ ) |
| 10                                        | 0.05     | 75                  | 841       | 8.99E-5                  | 1.24E-1 | 0.17                         |
|                                           |          | 100                 | 1205      | 2.68E-4                  | 4.43E-2 | 0.68                         |
|                                           |          | 125                 | 1801      | 7.70E-4                  | 1.46E-2 | 2.81                         |
|                                           |          | 150                 | 4150      | 2.56E-3                  | 5.84E-3 | 21.37                        |
|                                           |          | 175                 | 9616      | 6.15E-3                  | 1.68E-3 | 118.49                       |
|                                           |          | 100                 | 624       | 2.83E-5                  | 3.71E-1 | 0.06                         |
|                                           | 0.10     | 125                 | 1065      | 2.40E-4                  | 4.88E-2 | 0.54                         |
|                                           |          | 150                 | 2576      | 1.83E-3                  | 6.95E-3 | 9.50                         |
|                                           |          | 175                 | 6396      | 6.52E-3                  | 2.15E-3 | 83.58                        |
|                                           |          | 200                 | 16,840    | 1.56E-2                  | 9.58E-4 | 525.60                       |
|                                           |          | 150                 | 2279      | 6.85E-4                  | 1.47E-1 | 3.17                         |
|                                           |          | 175                 | 3878      | 3.60E-4                  | 3.06E-3 | 28.01                        |
|                                           | 0.20     | 200                 | 4637      | 5.82E-3                  | 1.78E-3 | 54.08                        |
|                                           |          | 150                 | 2272      | 2.36E-4                  | 4.55E-2 | 1.12                         |
|                                           |          | 175                 | 3648      | 2.14E-3                  | 5.41E-3 | 15.70                        |
|                                           |          | 200                 | 3714      | 3.65E-3                  | 2.87E-3 | 27.20                        |
|                                           |          | 125                 | 2117      | 2.65E-5                  | 8.64E-2 | 0.12                         |
|                                           |          | 150                 | 6958      | 7.77E-4                  | 3.13E-3 | 10.85                        |
| 0.30                                      | 175      | 35,781              | 6.25E-3   | 4.20E-4                  | 447.45  |                              |
|                                           | 150      | 6878                | 2.83E-4   | 9.68E-3                  | 1.98    |                              |
|                                           | 175      | 12,546              | 2.37E-3   | 9.84E-4                  | 59.53   |                              |
|                                           | 200      | 23,265              | 5.66E-3   | 3.93E-4                  | 263.47  |                              |
|                                           | 150      | 6333                | 3.56E-5   | 6.73E-2                  | 0.69    |                              |
|                                           | 175      | 7361                | 7.92E-4   | 2.87E-3                  | 11.70   |                              |
| 15                                        | 0.20     | 200                 | 8213      | 1.46E-3                  | 1.49E-3 | 24.02                        |
|                                           |          | 150                 | 11,987    | 2.59E-5                  | 9.46E-2 | 0.69                         |
|                                           |          | 160                 | 8327      | 1.13E-4                  | 2.12E-2 | 2.77                         |
|                                           | 0.30     | 165                 | 11,507    | 2.43E-4                  | 1.26E-2 | 5.66                         |
|                                           |          | 170                 | 15,079    | 5.36E-4                  | 4.41E-3 | 16.23                        |
|                                           |          | 175                 | 7491      | 3.29E-4                  | 7.67E-3 | 4.96                         |
|                                           | 0.05     | 200                 | 10,124    | 1.27E-3                  | 1.72E-3 | 25.76                        |
|                                           |          | 150                 | 10,018    | 1.028E-4                 | 7.00E-3 | 2.07                         |
|                                           |          | 175                 | 44,862    | 2.64E-3                  | 3.41E-4 | 236.95                       |
|                                           |          | 200                 | 194,567   | 8.74E-3                  | 1.09E-4 | 3401.40                      |
|                                           |          | 175                 | 21,630    | 7.93E-4                  | 1.14E-3 | 34.34                        |
|                                           |          | 200                 | 30,424    | 2.03E-3                  | 4.19E-4 | 123.57                       |
| 20                                        | 0.20     | 175                 | 26,853    | 4.10E-4                  | 2.20E-3 | 22.07                        |
|                                           |          | 200                 | 12,613    | 4.74E-4                  | 1.90E-3 | 11.98                        |
|                                           |          | 175                 | 14,932    | 4.44E-5                  | 2.07E-2 | 1.35                         |
|                                           | 0.30     | 200                 | 7775      | 6.71E-5                  | 1.36E-2 | 1.06                         |

$(2DP/1-S)$  in the last column is the square of the natural length scale  $\left(\left(\frac{2DP}{1-S}\right)^{\frac{1}{2}}\right)$  given in units of  $R_{cell}^2$  (Eq. 2).

Figs. 7, S3, and S4 show that all our simulated *cell* trajectories generate equally high-quality fits. Fig. 10 collapses experimental data sets analyzed by Thomas and collaborators (12) for 12 experiments; the fits are comparable in quality. As Figs. 7, 10, S3, and S4 plot the same family of curves on dimensionless axes, all experimental and simulation data for a given value of  $S$  overlap. We therefore expect that by choosing simulation parameters that match an experimentally observed value of  $S$ , we will be able to effectively replicate any of these experimental data sets, as we did in Fig. 9.

The modified Fürth equation adds a short-time diffusive correction to the original Fürth equation. Thomas et al.

(12) showed that experimental data agree with this correction and that it does not result from errors in position measurement, as sometimes suggested in the literature (63,64). Here, we tested our simulations for localization errors as an alternative explanation for short-time diffusion, but our tests ruled out this possibility; localization errors would produce deviations in short-time *MSD* several orders of magnitude smaller than those observed. See Supporting Materials and Methods Section S3 for details.

Execution times for the simulations are approximately proportional to the number of simulation lattice sites  $N = L_x \times L_y \times L_z$ , which is, by construction, proportional to  $R_{cell}^3$  and roughly independent of  $\lambda_{F-actin}$  and  $\phi_l$ . Fig. S5

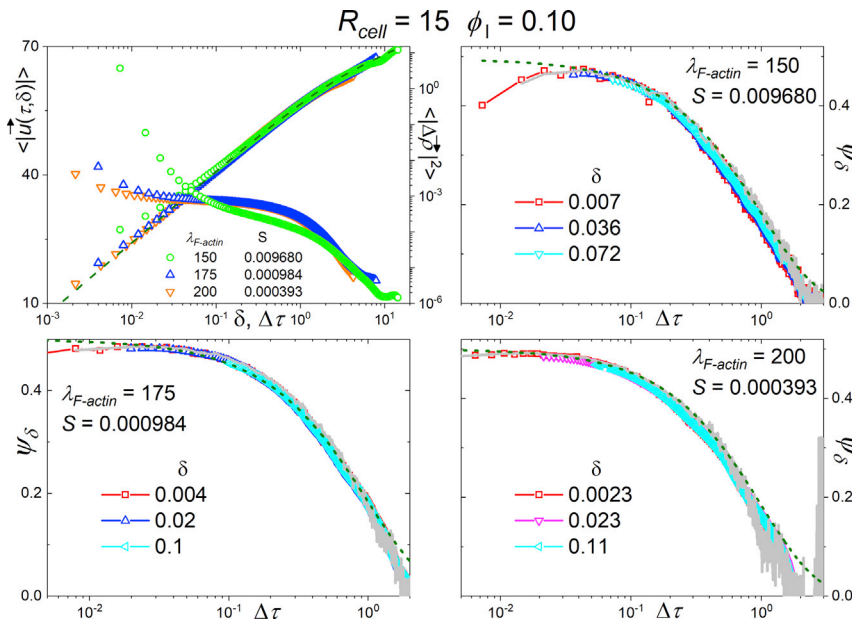

FIGURE 8 Analysis of simulations with  $R_{cell} = 15$  (lattice sites)<sup>1/3</sup>,  $\lambda_{F-actin} = 150$ , and  $\phi_I = 0.10$ . The top left panel shows the mean speed  $\langle |\vec{u}(\tau, \delta) | \rangle$  as a function of  $\delta$ , together with MSD curves (as a function of  $\Delta\tau$ ) for three different values of  $\lambda_{F-actin}$ . The other panels show, for the same data, the mean velocity autocorrelation function  $\psi_\delta(\Delta\tau)$  as a function of  $\Delta\tau$  for different values of  $\delta$ . In all panels, the olive dashed line corresponds to the original F\u00fcrth model. To see this figure in color, go online.

shows execution times for simulations with  $\lambda_{F-actin} = 150$  and  $\phi_I = 0.05$  and  $0.10$  performed on an Intel i7-3770K CPU. For a cell with  $R_{cell} = 15$ , a typical migration simulation of duration  $10^5$  MCS takes  $\sim 200$  min.

Validating any simulation result requires an objective quantitative metric to compare simulation and experimental data. In cell migration experiments tracking either center-of-mass or geometric center positions of individual cells and plotting the MSD versus time interval is a standard measurement. Although rough data for the MSD do not allow direct comparison between experiments or between experiments and simulations, the fit of these data to the classic F\u00fcrth equation allows direct comparison between experiments and simulations. However, the F\u00fcrth equation omits the short time/range diffusive motion usually observed in exper-

iments. We demonstrate here that our simulations replicate this fast diffusive behavior.

Our phenomenological model and simulation do not include detailed descriptions of the cytoskeleton dynamics in cell migration, so the fast diffusive behavior shown by simulations and experiments must emerge from general features of how fluctuations act on cell kinetics. To investigate further, we plotted  $S$  vs.  $D$  in Fig. 11 a, in which we measure  $D$  in units of  $(R_{cell}^2 / MCS)$ , as listed in Table 2. That the data collapse so nicely on a single curve means that  $D_{fast}$  is constant for a given value of  $R_{cell}$ . We fitted the points to the function  $S = (D_{fast} / D_{fast} + D)$ , using the mean value of  $D_{fast}$  for simulations with the same  $R_{cell}$ . Fig. 11 b shows  $S$  vs.  $D$  but with  $D$  given in units of  $((\text{lattice sites})^2 / MCS)$ . Fig. 11 c plots the average values of  $D_{fast}$  in units of

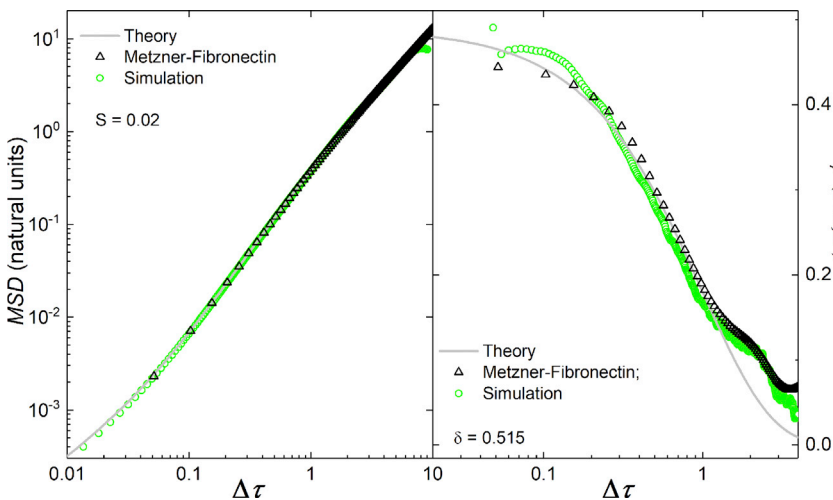

FIGURE 9 Comparison of simulations with  $R_{cell} = 15$ ,  $\phi_I = 0.30$ , and  $\lambda_{F-actin} = 160$  and Metzner data for cell migration on fibronectin coated substrates (50). Both experimental and simulation data yield the same value for the excess diffusion  $S = 0.02$ . The left panel shows the MSD. The right panel shows the mean velocity autocorrelation function for  $\psi_\delta(\Delta\tau)$  for with  $\delta = 0.515$ . The gray line shows the second derivative of the modified F\u00fcrth equation (Eq. 2) with  $S = 0.02$ . To see this figure in color, go online.

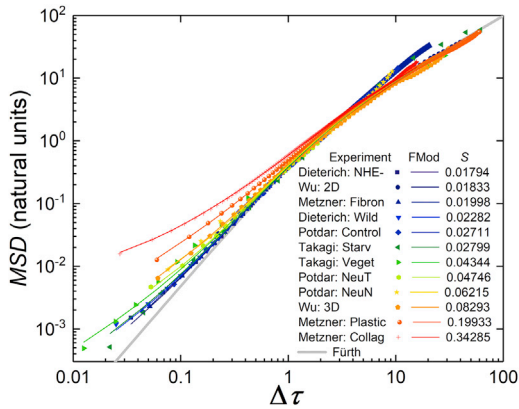

FIGURE 10 Fits of Eq. 2 for 12 experiments on cell migration from five different laboratories (49–53), as reported by Thomas et al. (12). The fits are as good as those for the simulated data and experiment in Fig. 9. To see this figure in color, go online.

$((\text{lattice sites})^{2/3} / \text{MCS})$  and shows that  $D_{\text{fast}}(R_{\text{cell}}) \sim R_{\text{cell}}^{-2}$ . Using this relation to rescale the abscissa in Fig. 11 d, we observe that the data collapse onto the same curve for all values of  $R_{\text{cell}}$ . The panels of Fig. 11 suggest that the magnitude of the additional term in the MSD is because excess diffusion depends on the number of lattice sites at the surface of the cell and that the excess diffusion is a stochastic term because of fluctuations of the cell surface.  $S$  and  $D$  could, in principle, be unrelated, but Fig. 11 clearly shows a correlation between the two parameters.  $S$  gives the time-scale for the short-time diffusive behavior, setting the time-scale at which the drift velocity takes over. We expect it to depend on a competition between the amplitude of fast fluctuations and the directional persistence of lamellipodium

protrusions. In these simulations, we kept the Boltzmann-like fluctuation amplitude ( $T_B$  in Table 1) fixed because changing the fluctuation amplitude might allow us to explore this relationship.

In summary, in our model, simulated *cells* migrate such that 1) they preferentially move in an (instantaneous) polarization direction; 2) this movement is always accompanied by random fluctuations in the direction perpendicular to the polarization direction; and 3) although the preferential direction may drift, the movements in both directions originate from the same mechanism of lattice site copying. We conclude that Fig. 11 shows that the ability of the parameterization in terms of  $S$ ,  $P$ , and  $D$  to reduce the trajectory data to a single parameter family of curves demonstrates a consistent relationship between the fluctuations in the forward and transverse directions. The relationship depends on  $R_{\text{cell}}^2$ , indicating that the *cell* surface plays an important role in linking these in-principle independent parameters. This linkage via the surface of the *cell* probably occurs because the important dynamics happens at the *lamellipodium* surface, and when *lamellipodium* is fully developed, the *lamellipodium* surface area fluctuates around a stationary value, proportional to the whole-cell surface area. The relationship between  $S$  and  $D$  displayed in Fig. 11 d suggests that fast and slow diffusion may share a common mechanistic origin.

Finally, we remark that, although we would not necessarily expect real cells of different types to show the same universal quantitative relation between membrane-fluctuation amplitude and persistence of migration direction (and thus to have their reduced MSDs fit to a single curve), when we plot  $S$  vs.  $D$  for a variety of cell-tracking

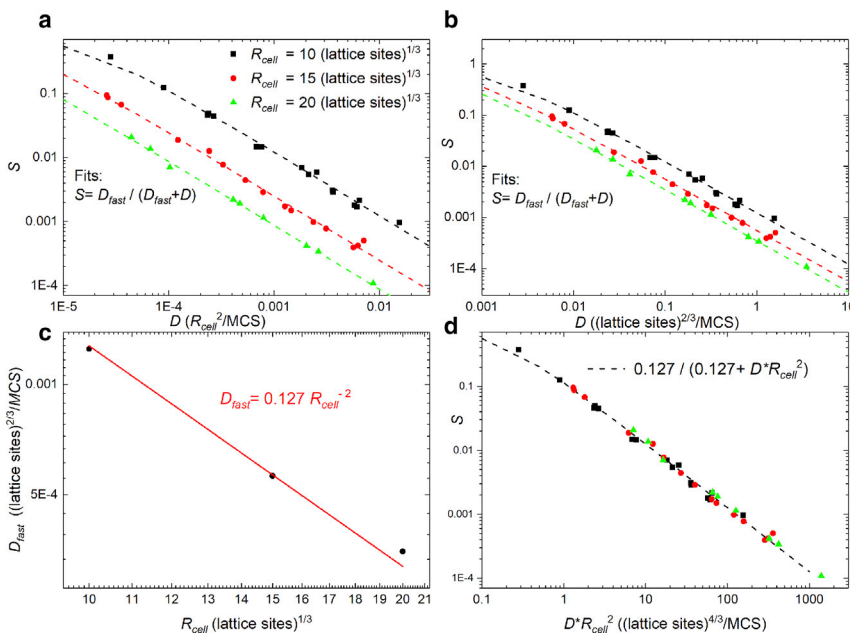

FIGURE 11 Correlation between  $S$  and  $D$ . To see this figure in color, go online. Rescaling of the abscissa to collapse the data in (a), (b), and (d).  $D_{\text{fast}}$  as a function of  $R_{\text{cell}}$ .

experiments, the experimental values fluctuate around the same function as the simulated ones,  $S = (1 + \text{constant} \times D)^{-1}$  [12].

Simulations allow more precise control of cell positioning and polarization direction than experiments. Fig. 12 shows the displacement “moduli”  $|\vec{\rho}(\tau + \Delta\tau) - \vec{\rho}(\tau)|$  for different  $\tau$  for one simulation run, calculated using different values of  $\Delta\tau$  as a function of the cell polarization, here defined as the distance between the lamellipodium and nucleus centers of mass measured at the beginning of the time interval. For  $\Delta\tau < S$ , in the short time/range diffusive regime, displacement and polarization are uncorrelated (black dots in Fig. 12, right lower panel). For  $S < \Delta\tau < 1$ , in the ballistic regime, displacement and polarization correlate (Fig. 12, left panel). For  $\Delta\tau > 1$ , in the long-time diffusive regime, we expect the cell polarization direction to change over intervals of  $\Delta\tau$ , reducing the correlation in (mean) velocity. Fig. 12’s upper right panel ( $\Delta\tau > 1$ ) and lower panel ( $\Delta\tau < S$ ) show decorrelation between the polarization and displacement. The upper panel, however, does not show self averaging, so it does not fill the plot as homogeneously as in the lower panel. This discrepancy results because the time series is not long enough for larger  $\Delta\tau$ . To ensure self averaging, the correlation between displacement and polarization for larger  $\Delta\tau$  requires longer trajectories. The short time/range diffusive regime provides quantitative information on the subcellular mechanisms that destabilize the cell polarization responsible for the ballistic regime, and hence may be critical to explain the mechanism of cell migration in a specific experiment. The methods we use to quantify cell motion yield a sound and robust criterion to choose adequate time intervals between measurements and experiment durations to quantify cell migration statis-

tics and correlate them with observations of cell polarization so that cell polarization may be used as a predictor for cell displacement.

## CONCLUSIONS

The MSDs from our simulations of cell crawling agree with the MSDs produced by the modified Fürth equation (Eq. 2) and, consequently, with any experimental measurements of the motility of the wide variety of cell types that fit to Eq. 2. Fitting MSD curves to the modified Fürth equation to determine  $S$ ,  $D$ , and  $P$  allows the rescaling of computational units of length (lattice sites)<sup>1/3</sup> and time (MCS) to experimental micrometers and minutes (the lack of a direct correspondence between CPM/GGH units and experimental units has been a concern in some previous studies). The strong agreement between the trajectory statistics for our simulations and experiments suggests that simple phenomenological models and simulations may provide sufficiently quantitative replication of real cell migration behavior to use in larger-scale simulations of multiple cells in tissue-engineering contexts. The simulations show the spontaneous polarization, persistent migration, and intermittent loss and reformation of leading edges that are typical of cells crawling in vitro on a flat, homogeneous substrate. The simulations are fast enough to use in simulations of organs and tissues with large numbers of cells; we will publish these results in future studies.

## SUPPORTING MATERIAL

Supporting Material can be found online at <https://doi.org/10.1016/j.bpj.2020.04.024>.

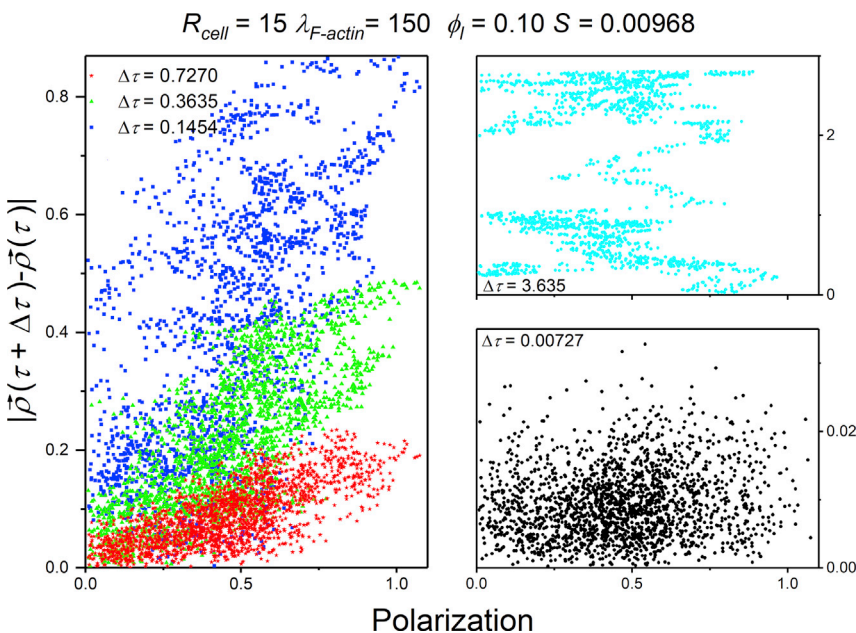

FIGURE 12 Cell displacement in units of cell radius calculated for  $\Delta\tau < S$  (black dots, lower right panel),  $S < \Delta\tau < 1$  (blue, green, and red dots, left panel), and  $\Delta\tau > 1$  (cyan dots, upper right panel) as a function of cell polarization for one simulation run with  $R_{\text{cell}} = 15$ ,  $\phi_l = 0.10$ , and  $\lambda_{F\text{-actin}} = 175$ . To see this figure in color, go online.

## AUTHOR CONTRIBUTIONS

I.F., G.C.P., and G.L.T. built and performed the simulation. I.F., G.L.T., and R.M.C.d.A. analyzed the data. M.S.K. and E.S. contributed biological background. G.L.T., J.M.B., J.A.G., and R.M.C.d.A. designed the research and wrote the manuscript.

## ACKNOWLEDGMENTS

R.M.C.d.A. and G.L.T. acknowledge the hospitality of the Biocomplexity Institute, Indiana University, Bloomington.

This work has received support from Brazilian agencies National Council for Scientific and Technological Development and Fundação de Amparo à Pesquisa do Estado do Rio Grande do Sul, and from Fundação de Amparo à Pesquisa do Estado do Rio Grande do Sul-PRONEX Grant 10/0008-0. R.M.C.d.A. and J.A.G. acknowledge support from the Falk Medical Research Trust Catalyst Program and the United States National Institutes of Health, Grants U24 EB028887, U01 GM111243, R01 GM122424, R01 GM076692, and R01 GM077138 and United States National Science Foundation Grant NSF 1720625.

## REFERENCES

- Mironov, V., V. Kasyanov, and R. R. Markwald. 2011. Organ printing: from bioprinter to organ biofabrication line. *Curr. Opin. Biotechnol.* 22:667–673.
- Weijer, C. J. 2009. Collective cell migration in development. *J. Cell Sci.* 122:3215–3223.
- Martin, P. 1997. Wound healing—aiming for perfect skin regeneration. *Science.* 276:75–81.
- Rognoni, E., A. O. Pisco, ..., F. M. Watt. 2018. Fibroblast state switching orchestrates dermal maturation and wound healing. *Mol. Syst. Biol.* 14:e8174.
- Muller, W. A. 2003. Leukocyte-endothelial-cell interactions in leukocyte transmigration and the inflammatory response. *Trends Immunol.* 24:327–334.
- Staruss, J., T. Bley, ..., A. Deutsch. 2007. A new mechanism for collective migration in *myxococcus xanthus*. *J. Stat. Phys.* 128:269–286.
- Wang, F. 2009. The signaling mechanisms underlying cell polarity and chemotaxis. *Cold Spring Harb. Perspect. Biol.* 1:a002980.
- Cramer, L. P. 2010. Forming the cell rear first: breaking cell symmetry to trigger directed cell migration. *Nat. Cell Biol.* 12:628–632.
- Asnacios, A., and O. Hamant. 2012. The mechanics behind cell polarity. *Trends Cell Biol.* 22:584–591.
- Dawes, A. T., and L. Edelstein-Keshet. 2007. Phosphoinositides and Rho proteins spatially regulate actin polymerization to initiate and maintain directed movement in a one-dimensional model of a motile cell. *Biophys. J.* 92:744–768.
- Goehring, N. W., and S. W. Grill. 2013. Cell polarity: mechanochemical patterning. *Trends Cell Biol.* 23:72–80.
- Thomas, G. L., I. Fortuna, ..., R. M. C. de Almeida. 2020. Parameterizing cell movement when the instantaneous cell migration velocity is ill-defined. *Physica A.* 550:124493.
- Blanch-Mercader, C., and J. Casademunt. 2013. Spontaneous motility of actin lamellar fragments. *Phys. Rev. Lett.* 110:078102.
- Lomakin, A. J., K. C. Lee, ..., G. Danuser. 2015. Competition for actin between two distinct F-actin networks defines a bistable switch for cell polarization. *Nat. Cell Biol.* 17:1435–1445.
- Callan-Jones, A. C., and R. Voituriez. 2016. Actin flows in cell migration: from locomotion and polarity to trajectories. *Curr. Opin. Cell Biol.* 38:12–17.
- Danuser, G., J. Allard, and A. Mogilner. 2013. Mathematical modeling of eukaryotic cell migration: insights beyond experiments. *Annu. Rev. Cell Dev. Biol.* 29:501–528.
- Disanza, A., A. Steffen, ..., G. Scita. 2005. Actin polymerization machinery: the finish line of signaling networks, the starting point of cellular movement. *Cell. Mol. Life Sci.* 62:955–970.
- Wedlich-Soldner, R., and R. Li. 2003. Spontaneous cell polarization: undermining determinism. *Nat. Cell Biol.* 5:267–270.
- Yam, P. T., C. A. Wilson, ..., J. A. Theriot. 2007. Actin-myosin network reorganization breaks symmetry at the cell rear to spontaneously initiate polarized cell motility. *J. Cell Biol.* 178:1207–1221.
- Ridley, A. J. 2011. Life at the leading edge. *Cell.* 145:1012–1022.
- Insall, R. H., and L. M. Machesky. 2009. Actin dynamics at the leading edge: from simple machinery to complex networks. *Dev. Cell.* 17:310–322.
- Vicente-Manzanares, M., M. A. Koach, ..., A. F. Horwitz. 2008. Segregation and activation of myosin IIB creates a rear in migrating cells. *J. Cell Biol.* 183:543–554.
- Maiuri, P., J. F. Rupprecht, ..., R. Voituriez. 2015. Actin flows mediate a universal coupling between cell speed and cell persistence. *Cell.* 161:374–386.
- Mullins, R. D. 2010. Cytoskeletal mechanisms for breaking cellular symmetry. *Cold Spring Harb. Perspect. Biol.* 2:a003392.
- Turing, A. M. 1952. The chemical basis of morphogenesis. *Philos. Trans. R. Soc. Lond. B Biol. Sci.* 237:37–72.
- Gierer, A., and H. Meinhardt. 1972. A theory of biological pattern formation. *Kybernetik.* 12:30–39.
- Meinhardt, H. 1999. Orientation of chemotactic cells and growth cones: models and mechanisms. *J. Cell Sci.* 112:2867–2874.
- Wolgemuth, C. W., J. Stajic, and A. Mogilner. 2011. Redundant mechanisms for stable cell locomotion revealed by minimal models. *Biophys. J.* 101:545–553.
- Niculescu, I., J. Textor, and R. J. de Boer. 2015. Crawling and gliding: a computational model for shape-driven cell migration. *PLoS Comput. Biol.* 11:e1004280.
- Fürth, R. 1920. Die Brownsche Bewegung bei Berücksichtigung einer Persistenz der Bewegungsrichtung. Mit Anwendungen auf die Bewegung lebender Infusorien. *Z. Phys.* 2:244–256.
- Guisoni, N., K. I. Mazzitello, and L. Diambra. 2018. Modeling active cell movement with. *Front. Phys.* 6:1.
- Lavi, I., M. Piel, ..., N. S. Gov. 2016. Deterministic patterns in cell motility. *Nat. Phys.* 12:1146–1152.
- Keren, K. 2011. Cell motility: the integrating role of the plasma membrane. *Eur. Biophys. J.* 40:1013–1027.
- Lou, S. S., A. Diz-Muñoz, ..., J. A. Theriot. 2015. Myosin light chain kinase regulates cell polarization independently of membrane tension or Rho kinase. *J. Cell Biol.* 209:275–288.
- Barnhart, E. L., G. M. Allen, ..., J. A. Theriot. 2010. Bipedal locomotion in crawling cells. *Biophys. J.* 98:933–942.
- Allard, J., and A. Mogilner. 2013. Traveling waves in actin dynamics and cell motility. *Curr. Opin. Cell Biol.* 25:107–115.
- Marée, A. F. M., V. A. Grieneisen, and L. Edelstein-Keshet. 2012. How cells integrate complex stimuli: the effect of feedback from phosphoinositides and cell shape on cell polarization and motility. *PLoS Comput. Biol.* 8:e1002402.
- Bottino, D., A. Mogilner, ..., G. Oster. 2002. How nematode sperm crawl. *J. Cell Sci.* 115:367–384.
- Zaman, M. H., R. D. Kamm, ..., D. A. Lauffenburger. 2005. Computational model for cell migration in three-dimensional matrices. *Biophys. J.* 89:1389–1397.
- Borau, C., R. D. Kamm, and J. M. García-Aznar. 2011. Mechano-sensing and cell migration: a 3D model approach. *Phys. Biol.* 8:066008.

41. Hogeweg, P. 2002. Computing an organism: on the interface between informatic and dynamic processes. *Biosystems*. 64:97–109.
42. Hawkins, R. J., R. Poincloux, ..., R. Voituriez. 2011. Spontaneous contractility-mediated cortical flow generates cell migration in three-dimensional environments. *Biophys. J.* 101:1041–1045.
43. Tozluoğlu, M., A. L. Tournier, ..., E. Sahai. 2013. Matrix geometry determines optimal cancer cell migration strategy and modulates response to interventions. *Nat. Cell Biol.* 15:751–762.
44. Sakamoto, Y., S. Prudhomme, and M. H. Zaman. 2014. Modeling of adhesion, protrusion, and contraction coordination for cell migration simulations. *J. Math. Biol.* 68:267–302.
45. Zhu, J., and A. Mogilner. 2016. Comparison of cell migration mechanical strategies in three-dimensional matrices: a computational study. *Interface Focus*. 6:20160040.
46. Chabaud, M., M. L. Heuzé, ..., A. M. Lennon-Duménil. 2015. Cell migration and antigen capture are antagonistic processes coupled by myosin II in dendritic cells. *Nat. Commun.* 6:7526.
47. Gundersen, G. G., and H. J. Worman. 2013. Nuclear positioning. *Cell*. 152:1376–1389.
48. Ornstein, L. S. 1919. On the Brownian motion. *Proc. Amst.* 21:96–108.
49. Potdar, A. A., J. Lu, ..., P. T. Cummings. 2009. Bimodal analysis of mammary epithelial cell migration in two dimensions. *Ann. Biomed. Eng.* 37:230–245.
50. Metzner, C., C. Mark, ..., B. Fabry. 2015. Superstatistical analysis and modelling of heterogeneous random walks. *Nat. Commun.* 6:7516.
51. Dieterich, P., R. Klages, ..., A. Schwab. 2008. Anomalous dynamics of cell migration. *Proc. Natl. Acad. Sci. USA*. 105:459–463.
52. Takagi, H., M. J. Sato, ..., M. Ueda. 2008. Functional analysis of spontaneous cell movement under differential physiological conditions. *PLoS One*. 3:e2648.
53. Wu, P. H., A. Giri, and D. Wirtz. 2015. Statistical analysis of cell migration in 3D using the anisotropic persistent random walk model. *Nat. Protoc.* 10:517–527.
54. Graner, F., and J. A. Glazier. 1992. Simulation of biological cell sorting using a two-dimensional extended Potts model. *Phys. Rev. Lett.* 69:2013–2016.
55. Glazier, J. A., and F. Graner. 1993. Simulation of the differential adhesion driven rearrangement of biological cells. *Phys. Rev. E*. 47:2128–2154.
56. Swat, M. H., G. L. Thomas, ..., J. A. Glazier. 2012. Multi-scale modeling of tissues using CompuCell3D. *Methods Cell Biol.* 110:325–366.
57. Scianna, M., L. Munaron, and L. Preziosi. 2011. A multiscale hybrid approach for vasculogenesis and related potential blocking therapies. *Prog. Biophys. Mol. Biol.* 106:450–462.
58. Dias, A. S., I. de Almeida, ..., C. D. Stern. 2014. Somites without a clock. *Science*. 343:791–795.
59. Belmonte, J. M., S. G. Clendenon, ..., R. L. Bacallao. 2016. Virtual-tissue computer simulations define the roles of cell adhesion and proliferation in the onset of Kidney cystic disease. *Mol. Biol. Cell*. 27:3673–3685.
60. Holm, E. A., J. A. Glazier, ..., G. S. Grest. 1991. Effects of lattice anisotropy and temperature on domain growth in the two-dimensional Potts model. *Phys. Rev. A*. 43:2662–2668.
61. Lee, J., and K. Jacobson. 1997. The composition and dynamics of cell-substratum adhesions in locomoting fish keratocytes. *J. Cell Sci.* 110:2833–2844.
62. Selmececi, D., S. Mosler, ..., H. Flyvbjerg. 2005. Cell motility as persistent random motion: theories from experiments. *Biophys. J.* 89:912–931.
63. Li, L., S. F. Nørrelykke, and E. C. Cox. 2008. Persistent cell motion in the absence of external signals: a search strategy for eukaryotic cells. *PLoS One*. 3:e2093.
64. Pedersen, J. N., L. Li, ..., H. Flyvbjerg. 2016. How to connect time-lapse recorded trajectories of motile microorganisms with dynamical models in continuous time. *Phys. Rev. E*. 94:062401.

**Biophysical Journal, Volume 118**

**Supplemental Information**

**CompuCell3D Simulations Reproduce Mesenchymal Cell Migration on  
Flat Substrates**

**Ismael Fortuna, Gabriel C. Perrone, Monique S. Krug, Eduarda Susin, Julio M. Belmonte, Gilberto L. Thomas, James A. Glazier, and Rita M.C. de Almeida**



# CompuCell3D simulations reproduces mesenchymal cell migration on flat substrates

Ismael Fortuna, Gabriel C. Perrone, Monique S. Krug, Eduarda Susin, Julio M. Belmonte,

Gilberto L. Thomas, James A. Glazier, and Rita M.C. de Almeida

## Supporting Information S1. Instructions for fitting

Using Eq. (2) in the main text, and its second derivative with respect to  $\Delta t$ , we can determine  $D$ ,  $P$ , and  $S$  from experimental or simulated trajectory data, as follows [1]:

- i) Obtain the  $MSD$  from the trajectories;
- ii) Calculate the second time derivative for the experimental  $MSD$ ;
- iii) Fit the results in step ii to the second derivative of Eq. (2) to determine  $D$  and  $P$ ;
- iv) With these values for  $D$  and  $P$ , evaluate the original Fürth Equation (Eq. (2) with  $S = 0$ ) and subtract from the simulation data.
- v) Use a linear fit to the residual to determine its slope  $2D_{fast}$ . This residual represents the correction term to the original Fürth Equation.
- vi) Add the correction term to the original Fürth Equation and compare to the measured  $MSD$  to assess the quality of the model prediction.
- vii) Calculate  $S = \frac{D_{fast}}{D_{fast} + D}$ . Larger values of  $S$  mean that the fast-time diffusive regime is observable for longer time intervals.

## Supporting Information S2. CompuCell3D Project to Replicate Results Presented in this Paper

### General discussion of the project simulation files and contents

The ability to replicate simulation results is a core aim of best-practice model development. CompuCell3D allows compact model simulation and execution, making publication of replicable models practical. This supplement contains the code and instructions for replication of all simulations presented in this paper. Note that simulations are stochastic, so that results of individual instances of simulations will differ. However, ensembles of simulations for the same parameter sets should closely reproduced the results, which we present in this paper.

CompuCell3D (**CC3D**) is an open source modeling framework, which executes under most PC, Mac and Linux operating systems. Downloads and installation instructions are available from <http://www.compuCell3d.org/>. This site provides one-button installers for most PC and Mac configurations. It also provides source code and binaries for some flavors of Linux. The site also archives older executables of CC3D to allow control for changes in program behavior during revision. The published simulations were executed using CC3D version 3.5.1, but execute and reproduce the original results in CompuCell3D version 3.7.9.

CC3D executables consist of two tightly-coupled Graphical User Interfaces (**GUIs**), Twedit++ (a simulation editor, which allows users to modify simulation specifications) and Player

(which executes simulation specifications and displays and stores simulation results). A CompuCell3D simulation specification consists of a hierarchical group of files and folders. Most simulation specifications combine scripts written in Python and various XMLs. Specifically, a CC3D simulation **<project>** contains at least four files: an XML **project manager**, called **<project>.cc3d**, a Python **control file**, called **<project>.py**, a Python **steppable file**, called **<project\_steppables>.py**, and an XML **parameter scan file**, called **ParameterScanSpecs.xml**. CompuCell3D stores the project manager file in a folder that usually shares the project name **<project>**, and stores the three other files in a subfolder called **Simulation (<project>/Simulation)**. If you are new to CC3D simulations, please watch the presentation [http://compuCell3d.org/BinDoc/cc3d\\_binaries/Presentations/Introduction\\_To\\_CompuCell/CompuCell\\_intro\\_2014\\_Hamner.pdf](http://compuCell3d.org/BinDoc/cc3d_binaries/Presentations/Introduction_To_CompuCell/CompuCell_intro_2014_Hamner.pdf).

To execute a simulation, launch Twedit++, select *Open CC3D Project* from the *CC3D Project* pulldown menu and open the project manager file (in this case, *CellMig3D*). Execute the simulation by selecting the *CellMig3D.cc3d* file in the left-hand subwindow and “right clicking” and selecting *Open in Player*. Alternatively, launch *Player*, select *Open Simulation* from the *File* pulldown menu and select the **CellMig3D.cc3d** file. In either case, the simulation should now execute. You can use the *Windows* pulldown menu *Tile* option to adjust the display layout to improve your visualization of the executing simulation.

In what follows, we describe briefly each of the four files:

The file **<project>.cc3d** tells CC3D which files *Player* should run and where to find the parameters for the simulation(s). Our project is called *CellMig3D*, so the name of the project manager is **CellMig3D.cc3d**. *CellMig3D.cc3d* contains the lines

```
<Simulation version="3.5.1">
  <PythonScript Type="PythonScript">Simulation/CellMig3D.py</PythonScript>
  <Resource Type="Python">Simulation/CellMig3D_Steppables.py</Resource>
  <ParameterScan Type="ParameterScan">Simulation/ParameterScanSpecs.xml</ParameterScan>
</Simulation>
```

The Python **<project>.py** control file specifies the simulation components and environment definitions: cell sizes and types, lattice size, interaction energies, calculation frequencies, simulation duration, chemical fields, etc.... It also calls the calculation subroutines (**CC3D plugins**): center-of-mass position, neighbor tracker, etc... In our project, the name of the control file is **CellMig3D.py**.

The steppable file, **CellMig3D\_Steppables.py**, specifies any temporally dynamic components of the simulation structure and parameters, performs the simulation analysis and displays and stores data, at intervals specified by the control file. Our project has two output files: one contains information about cell compartments’ center-of-mass displacements, and the other contains information about cell symmetry breaking. The simulation updates these output files at the frequency defined in the control file. The simulation stores output files in a subfolder of the **<project>** folder.

Finally, the XML **ParameterScanSpecs.xml** file contains the list of the parameters we will sweep in the simulation, with their ranges (values) of variation. All the values we have used in this work are listed in it. Of course, the simulations can be grouped in sets of parameters. The file provided in the supplementary material generates 10 replicas for each parameter set, where the parameter sets have three possible cell radii, four values of  $\phi_iF$  and seven values of  $\lambda_{CHEM}$ . So executing the file runs a set of simulations consisting of a total of  $10 \times 3 \times 4 \times 7 = 830$  individual simulations. This file generates all of the individual simulations used in the paper:

```

<ParameterScan version="3.7.0">
  <OutputDirectory>CellMig3D_ParameterScan</OutputDirectory>
  <ParameterList Resource="Simulation/CellMig3D.py">
    <Parameter CurrentIteration="0" Name="RANDOM_SEED" Type="PYTHON_GLOBAL"
ValueTypes="int">
      <Values>68721, 198463, 206497, 211561, 217236, 240803, 353789, 380866, 404317,
410770</Values>
    </Parameter>
    <Parameter CurrentIteration="0" Name="deltaT" Type="PYTHON_GLOBAL" ValueTypes="int">
      <Values>50</Values>
    </Parameter>
    <Parameter CurrentIteration="0" Name="cellRad" Type="PYTHON_GLOBAL"
ValueTypes="float">
      <Values>10., 15., 20.</Values>
    </Parameter>
    <Parameter CurrentIteration="0" Name="phiF" Type="PYTHON_GLOBAL" ValueTypes="float">
      <Values>0.05, 0.1, 0.2, 0.3</Values>
    </Parameter>
    <Parameter CurrentIteration="0" Name="lambCHEM" Type="PYTHON_GLOBAL"
ValueTypes="float">
      <Values>-75., -100., -125., -150., -175., -200., -250</Values>
    </Parameter>
  </ParameterList>
</ParameterScan>

```

The values in the list for the parameter RANDOM\_SEED define the number of replicas for each parameter set (deltaT, cellRad, phiF, lambCHEM). Each time a simulation replica starts, the CurrentIteration variable for each parameter increments by 1. For example, the replica that runs with RANDOM\_SEED = 198463, deltaT = 50, cellRad = 15.0, phiF = 0.1, and lambCHEM = -100.0, will be replica number 161 (the replica counter starts at "0"). These values will be also used to assemble the associated output filenames. Identifying cellRad as "R", phiF as "pF", lambCHEM as "lC", and deltaT as "dT", sample filenames are:

- *161\_R15.0\_pF0.1\_lC-175.0\_dT50\_Displacement.dat*  
This file contains 13 columns: time (MCS), the center-of-mass coordinates of the cell's three compartments C, F, and N, and the center-of-mass coordinates of the entire cell.
- *161\_R15.0\_pF0.1\_lC-175.0\_dT50\_SBAAn.dat*,  
This file contains 8 columns: time (MCS), the distance between the center-of-mass of the F compartment and the center of mass of the combined C and N compartments, the z-coordinate of the N compartment, the area of the boundary between the C and F compartments, the volume of the C compartment, the volume of the F compartment, the volume of the N compartment, and the volume of the entire cell. All lengths and areas are in units of lattice sites to the appropriate power.

CC3D simulations have a natural time unit of a Monte Carlo Step (MCS). The calculations for mean-squared-displacement rescale both experiment and simulation times by the measured persistence times. The ratio of these two persistence times converts MCS into experimental time units

To generate different simulations using the **ParameterScanSpecs.xml** file, you must change the numbers between the appropriate tag pairs of form **<Values> ... </Values>**. For example, to run 5 replicas of a simulation with deltaT = 50, cellRad = 20.0, phiF = 0.2, and lambCHEM = -150.0, the modified **ParameterScanSpecs.xml** file reads:

```

<ParameterScan version="3.7.0">
  <OutputDirectory>CellMig3D_ParameterScan</OutputDirectory>
  <ParameterList Resource="Simulation/CellMig3D.py">
    <Parameter CurrentIteration="0" Name="RANDOM_SEED" Type="PYTHON_GLOBAL"
ValueTypes="int">
      <Values>68721, 198463, 206497, 211561, 217236</Values>
    </Parameter>
    <Parameter CurrentIteration="0" Name="deltaT" Type="PYTHON_GLOBAL" ValueTypes="int">
      <Values>50</Values>
    </Parameter>
    <Parameter CurrentIteration="0" Name="cellRad" Type="PYTHON_GLOBAL"
ValueTypes="float">
      <Values>20.</Values>
    </Parameter>
    <Parameter CurrentIteration="0" Name="phiF" Type="PYTHON_GLOBAL" ValueTypes="float">
      <Values>0.2</Values>
    </Parameter>
    <Parameter CurrentIteration="0" Name="lambCHEM" Type="PYTHON_GLOBAL"
ValueTypes="float">
      <Values>-150.</Values>
    </Parameter>
  </ParameterList>
</ParameterScan>

```

where **bold face** indicates lines changed from the version of the **ParameterScanSpecs.xml** provided.

## How to modify and run the project simulation using CC3D

First, download the appropriate CC3D installer or binary package from <http://compuCell3d.org/> and install it. On Windows computers, we recommend installing to the "Desktop" rather than the "Programs" directory to avoid permission clashes. Download the compressed project file and unpack it to a folder in your workspace.

Launch the CC3D project editor/creator **Twedit++** using the method appropriate to your operating system. Click on *CC3d Project* and then on *Open CC3D Project*. Go to the folder where you unpacked the project files and open the .cc3d file. This selected project will now show in **Twedit++**'s leftmost project structure panel, which displays the file hierarchy of open projects. Clicking on the project will display the project's component files and will open both the Python files described in the previous section, as tabs in **Twedit++**'s right editing panel.

If you want to run the simulation for a specific set of parameters, click on *ParameterScan* in **Twedit++**'s leftmost project structure panel to open the **ParameterScanSpecs.xml** file for editing. **ParameterScanSpecs.xml** specifies all externally-controlled simulation parameters. Make any changes desired to the number of replicas, choices of "deltaT" or other swept parameters. **CellMig3D\_Steppables.py** specifies all other simulation parameters, as given in Table 2 of the main text. These parameters are left the same in each simulation replica. You can change any of these values by clicking on *CellMig3D\_Steppables* in **Twedit++**'s leftmost project structure panel to open the **CellMig3D\_Steppables.py** file for editing.

Save all files using the *Save All* button or the *Save CC3D Project As* menu item in the *CC3D Project* pulldown menu, then right click on the project name in **Twedit++**'s leftmost project structure panel. Click on *Open in Player*. The CC3D player will open and start the series of simulations specified in **ParameterScanSpecs.xml**.

## Simulation initial configuration

Our simulations use a 3D square lattice with periodic boundary conditions, of size  $(L_x, L_y, L_z)$ , defined in units of the of cell radius,  $R_{cell}$ . Initially, the number of lamellipodium sites is zero and the cell is spherical. The cell flattens on contact with the substrate and the lamellipodium forms and spreads rapidly due to the target-volume effective energy term. The lamellipodium target volume is proportional to  $R_{cell}^3$  and  $\phi_l$ . Consequently, the horizontal dimensions of the cell-lattice must increase with  $R_{cell}$  and  $\phi_l$ . The following cell-lattice dimensions sufficed to prevent the cell spanning any single cell-lattice dimension and causing an artifact due to the periodic boundary conditions:

$$L_z = 2.1 R_{cell},$$
$$L_x = L_y = \begin{cases} 8 R_{cell}, & \text{if } R_{cell} < 20 \text{ lattice sites}^{1/3} \text{ or } \phi_l < 0.20 \\ 10 R_{cell}, & \text{if } 20 \text{ lattice sites}^{1/3} \leq R_{cell} < 30 \text{ lattice sites}^{1/3} \text{ and } \phi_l \geq 0.20 \\ 12 R_{cell}, & \text{if } 30 \text{ lattice sites}^{1/3} \leq R_{cell} < 40 \text{ lattice sites}^{1/3} \text{ and } \phi_l \geq 0.20 \\ 14 R_{cell}, & \text{if } 40 \text{ lattice sites}^{1/3} \leq R_{cell} \text{ and } \phi_l \geq 0.20 \end{cases} \quad (S1)$$

Inside the lattice, the lattice sites with coordinates at  $(x, y, z = 0)$  are frozen and set to a generalized cell of type substrate. All other lattice sites not in a cell compartment are set to a generalized cell of type medium. Initially the cell is a sphere centered on coordinates  $(\frac{L_x}{2}, \frac{L_y}{2}, \frac{L_z}{2})$  consisting of two concentric compartments, a central sphere, of cell type nucleus and a surrounding spherical shell, of cell type cytoplasm. When lattice sites of type cytoplasm come into contact with lattice sites of generalized cell type substrate they create lattice sites of cell type lamellipodium, as illustrated in the main text.

## Additional File S1. Simulated cell migration - movie

**Cellmigration.mp4:** Simulations with  $R_{cell} = 15 \text{ lattice sites}^{1/3}$ ,  $\phi_l = 0.10$ , and  $\lambda_{F-actin} = 175$ . Snapshots show configuration at  $10^5$  MCS. Time interval between frames is 100 MCS.

## Supporting Figure S1

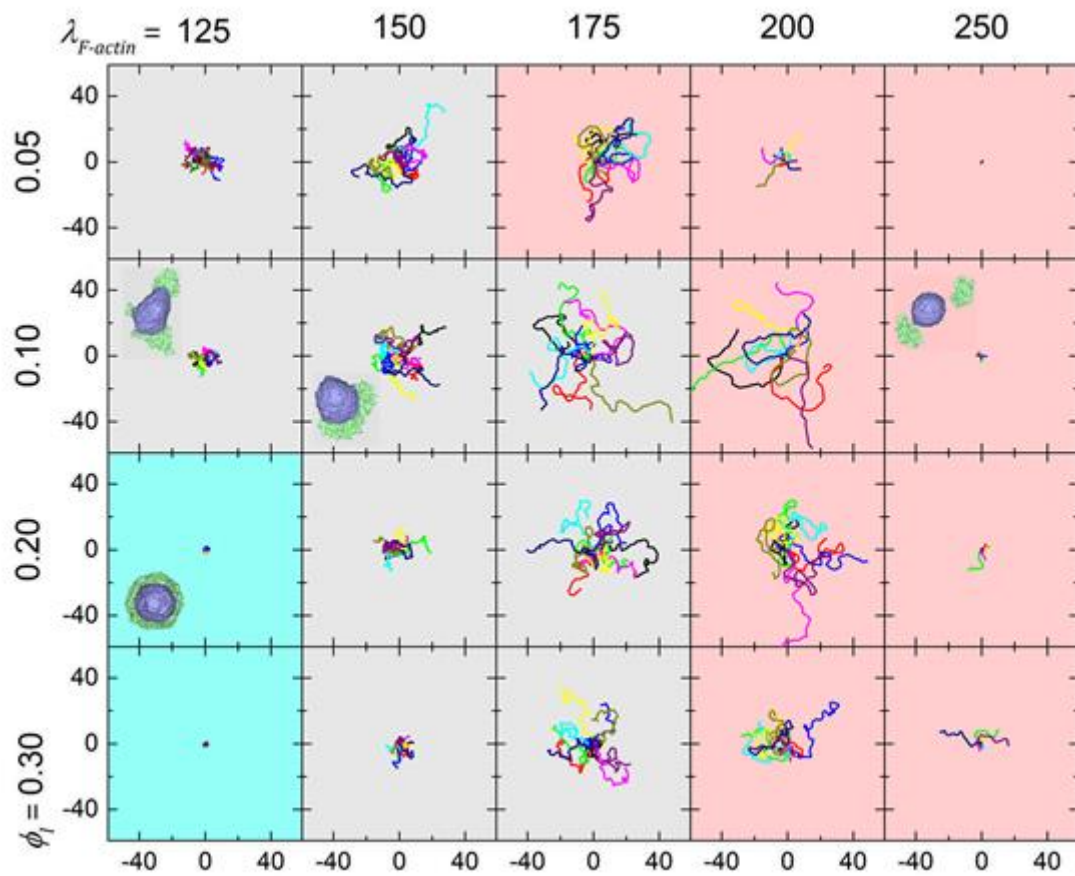

**FIG. S1.** Typical cell trajectories and (selected) morphologies for different values of  $\phi_l$  and  $\lambda_{F-actin}$ . Each panel shows 10 cell trajectories of length  $10^5$  MCS, with  $R_{cell} = 10$  (lattice sites) $^{1/3}$ . Axes show  $x$  and  $y$  positions measured relative to the center of the cell lattice in units of  $R_{cell}$ . The background color indicates confinement (cyan), persistent migration (gray), and artefactual lamellipodium detachment (light red). Larger  $\lambda_{F-actin}$  and smaller  $\phi_l$  increase cell motility. When  $\lambda_{F-actin}$  is too small, the lamellipodium remains symmetrical and the cell does not migrate, while for very small  $\phi_l$ , the lamellipodium is not strong enough to cause cell migration (not shown).

## Supporting Figure S2

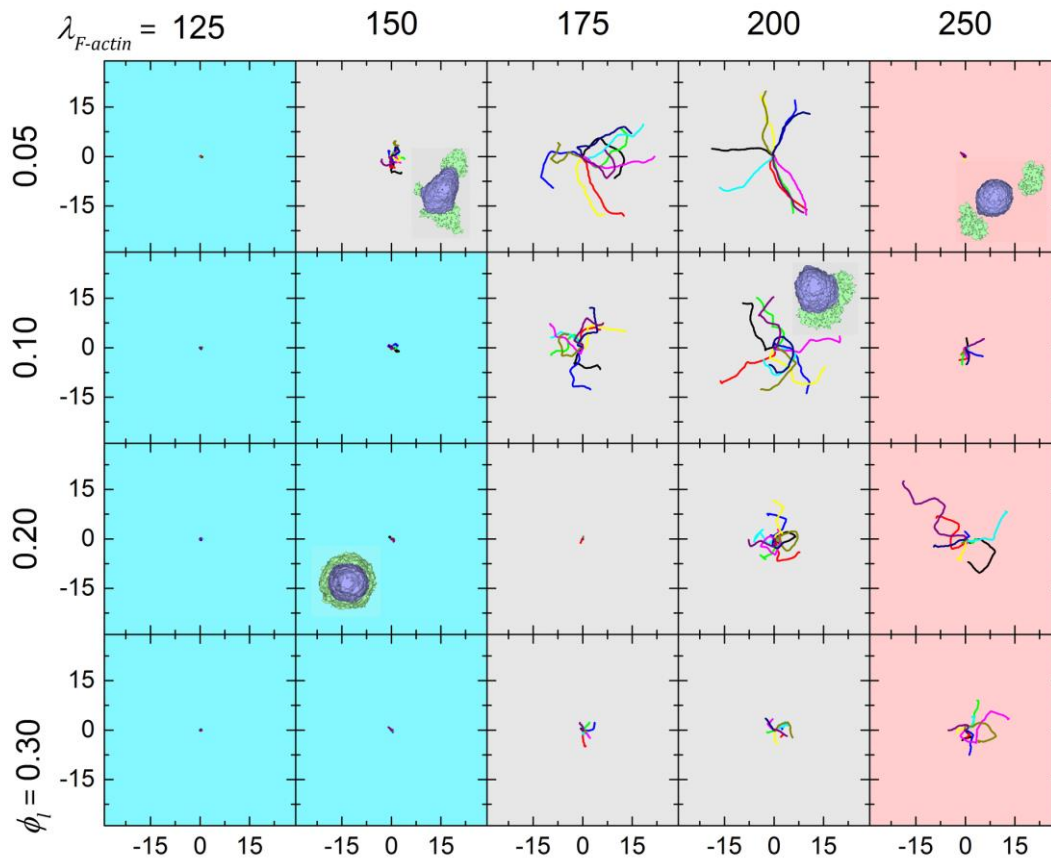

**FIG. S2.** Typical cell trajectories and (selected) morphologies for different values of  $\phi_l$  and  $\lambda_{F-actin}$ . Each panel shows 10 cell trajectories of length  $10^5$  MCS, with  $R_{cell} = 20$  (lattice sites) $^{1/3}$ . Axes show  $x$  and  $y$  positions measured relative to the center of the cell lattice in units of  $R_{cell}$ . The background color indicates confinement (cyan), persistent migration (gray), and artefactual lamellipodium detachment (light red). Larger  $\lambda_{F-actin}$  and smaller  $\phi_l$  increase cell motility. When  $\lambda_{F-actin}$  is too small, the lamellipodium remains symmetrical and the cell does not migrate, while for very small  $\phi_l$ , the lamellipodium is not strong enough to cause cell migration (not shown).

### Supporting Figure S3

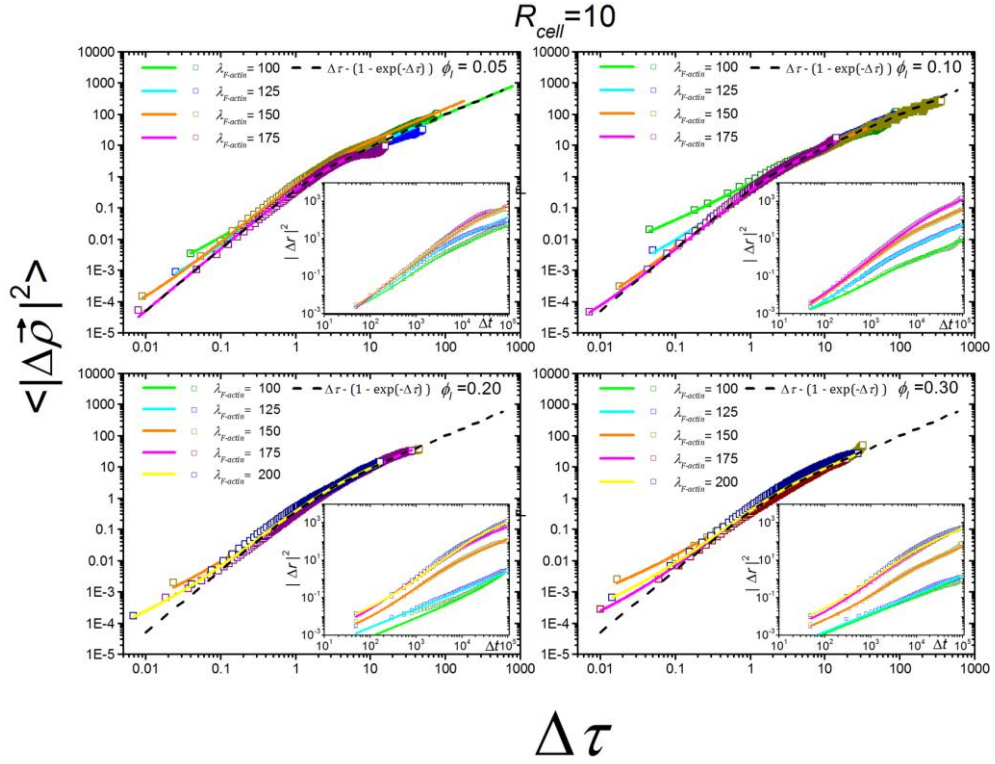

**FIG. S3.** MSD ( $\langle |\Delta \vec{\rho}|^2 \rangle$ ) vs.  $\Delta \tau$  in a log-log plot, both quantities rescaled as in Figure 2, for cells with  $R_{cell} = 10$  (lattice sites) $^{1/3}$ , averaged over 5 replicas. The insets present the unscaled data in units of MCS and cell radius.



## Supporting Figure S4

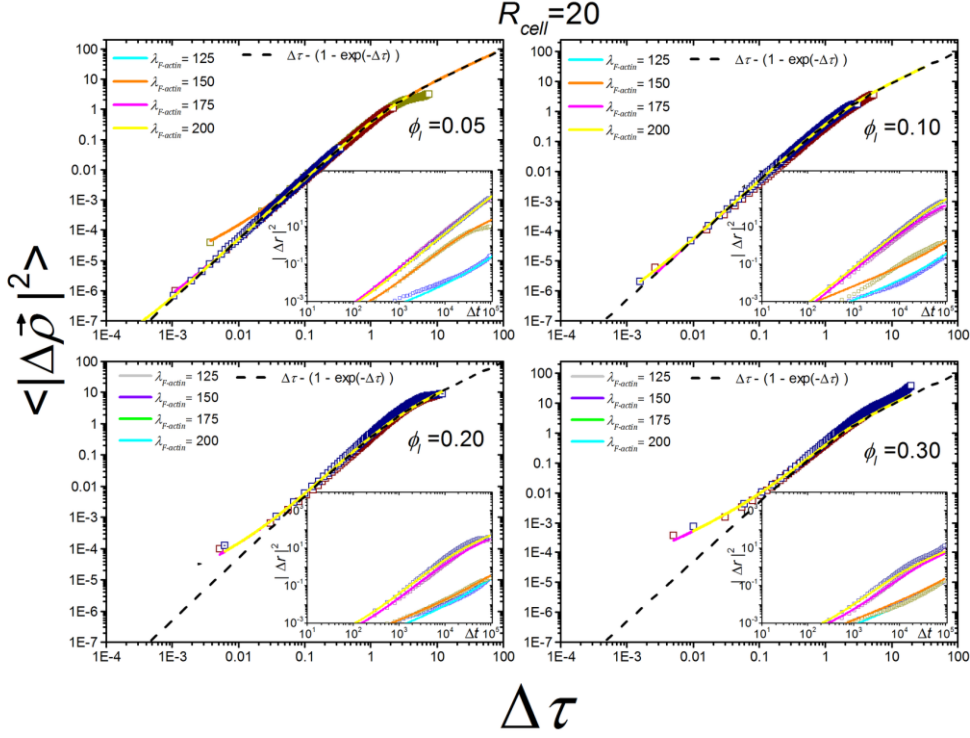

**FIG. S4.** *MSD* ( $\langle |\Delta \vec{\rho}|^2 \rangle$ ) vs.  $\Delta \tau$  in a log-log plot, both quantities rescaled as in Figure 2, for cells with  $R_{cell} = 20$  (lattice sites) $^{1/3}$ , averaged over 5 replicas. The insets present the unscaled data in units of MCS and cell radius.

## Supporting Information S3. Estimate of localization error as a possible explanation for observed short-time *MSD* behavior.

The fitting procedure that produced Figs. 5, S3, and S4 requires the short-time diffusive correction to the Fürth equation. We tested for localization error as an alternative explanation for short-time diffusion, but we ruled out this possibility: localization errors in these simulations would produce deviations in short-time *MSD* several orders of magnitude smaller than those we observed. Fluctuations due to the spatial discreteness of the simulation also have a different effect on the *MSD* and velocity autocorrelation function from those we observed. We obtained *MSD* curves by measuring the nucleus center-of-mass position in the  $xy$  plane of the cell, calculated using the  $x$  and  $y$  coordinates of all lattice sites of the nucleus. All lattice sites at the nucleus surface contribute a segmentation error to our estimate of the nucleus center-of-mass position. Since this positional error is uncorrelated over times when the cell moves significantly, the error is diluted by averaging over the  $\frac{T-\Delta t}{\Delta t}$  time intervals present in one trajectory. Thus the estimated error is:

$$\varepsilon \sim \frac{0.53}{\sqrt{\frac{T-\Delta t}{\Delta t}} R_{cell}^3} \text{ pixels}, \quad (13)$$

where we have taken the nucleus volume to be 0.15 of the cell volume and hence the nucleus radius to be  $0.15^{1/3} R_{cell}$ . For  $R_{cell} = 15$  (lattice sites) $^{1/3}$ , and taking  $\left(\frac{T-\Delta t}{\Delta t}\right) =$

1999 in our simulations, we find  $\varepsilon \sim 3.5 \times 10^{-6} (\text{lattice sites})^{1/3}$ . Table S1 presents the the expected deviations due to segmentation error from the Fürth behavior for short-time intervals of the  $MSD$  curves for an  $R_{cell} = 15 (\text{lattice sites})^{1/3}$  simulation.

Comparing the error estimates in Eq. (13) with the values in the last column of Table 2 in the main text, shows that the observed  $MSD$  deviations from Fürth behavior in the simulations are not due to segmentation error. Together with the fitting procedure results, these results indicate that a diffusive term is the leading correction to the Fürth equation at short-time scales.

| $\lambda_{F-actin}$ | $MSD$ deviation<br>( $R_{cell}^2$ ) | $MSD$ deviation<br>(lattice sites) $^{2/3}$ | $\sqrt{MSD}$ deviation<br>(lattice sites) $^{1/3}$ |
|---------------------|-------------------------------------|---------------------------------------------|----------------------------------------------------|
| 150                 | 3.26E-04                            | 7.33E-02                                    | 0.27                                               |
| 175                 | 3.29E-04                            | 7.40E-2                                     | 0.27                                               |
| 200                 | 3.11E-04                            | 7.00E-02                                    | 0.26                                               |

Table S1.  $MSD$  deviations from Fürth behavior in the short-time regime for  $R_{cell} = 15$  and  $\phi_l = 0.05$ .

### Supporting Figure S5

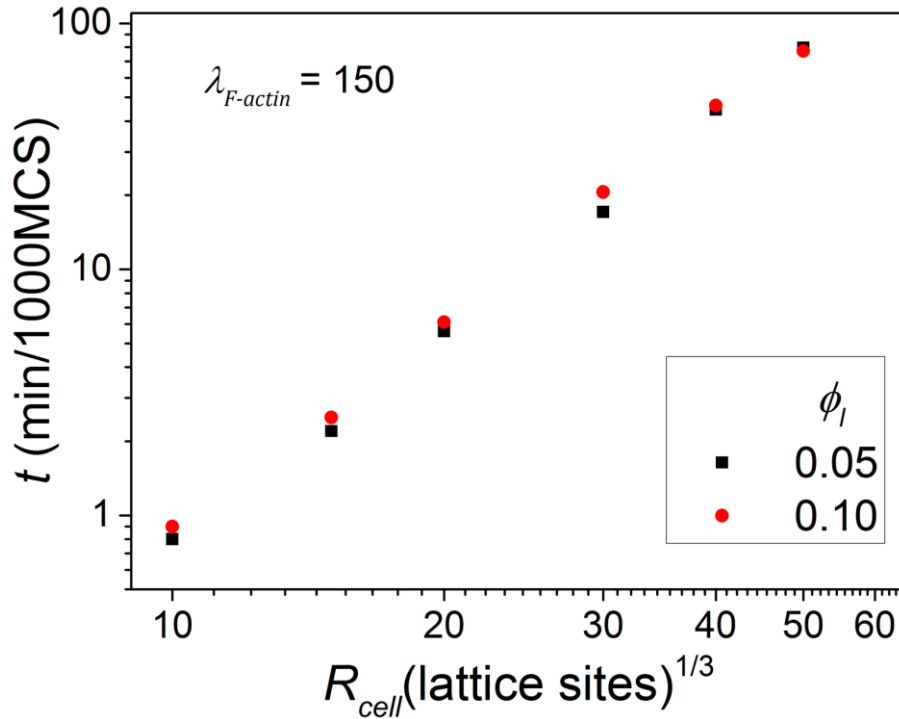

FIG. S5. Simulation execution times (in min/1000 MCS) as a function of cell radius  $R_{cell}$ . Execution times are roughly independent of  $\lambda_{F-actin}$  (not shown) and  $\phi_l$ .

## Supporting References

- [1] Gilberto Lima Thomas et al., "Parameterizing Cell Movement when the Instantaneous Cell Migration Velocity is Ill-Defined," *Submitted*, 2019.
